# Supplementary material
Source: PubMed Central journal article supplement (PMC10233213)
Supplement: mmc1.pdf [file mmc1.pdf]

# Upgrading nirmatrelvir to prevent SARS-CoV-2 Mpro via DeepFrag and free energy calculations

Nguyen Minh Tam,<sup>a</sup> Trung Hai Nguyen,<sup>b,c</sup> Minh Quan Pham,<sup>d,e</sup> Nam Dao Hong,<sup>f</sup> Nguyen Thanh Tung,<sup>e,g\*</sup> Van V. Vu,<sup>h</sup> Duong Tuan Quang,<sup>i,\*</sup> and Son Tung Ngo<sup>b,c,\*</sup>

<sup>a</sup>*Faculty of Basic Sciences, University of Phan Thiet, Phan Thiet City, Binh Thuan, Vietnam*

<sup>b</sup>*Laboratory of Biophysics, Institute for Advanced Study in Technology, Ton Duc Thang University, Ho Chi Minh City, Vietnam*

<sup>c</sup>*Faculty of Pharmacy, Ton Duc Thang University, Ho Chi Minh City, Vietnam*

<sup>d</sup>*Institute of Natural Products Chemistry, Vietnam Academy of Science and Technology, Hanoi, Vietnam*

<sup>e</sup>*Graduate University of Science and Technology, Vietnam Academy of Science and Technology, Hanoi, Vietnam*

<sup>f</sup>*University of Medicine and Pharmacy at Ho Chi Minh City, Ho Chi Minh City, Vietnam*

<sup>g</sup>*Institute of Materials Science, Vietnam Academy of Science and Technology, Hanoi, Vietnam*

<sup>h</sup>*NTT Hi-Tech Institute, Nguyen Tat Thanh University, Ho Chi Minh City, Vietnam*

<sup>i</sup>*Department of Chemistry, Hue University, Thua Thien Hue Province, Hue City, Vietnam*

\*Corresponding email: [tungnt@ims.vast.ac.vn](mailto:tungnt@ims.vast.ac.vn), [dtquang@hueuni.edu.vn](mailto:dtquang@hueuni.edu.vn) and [ngosontung@tdtu.edu.vn](mailto:ngosontung@tdtu.edu.vn)

Table S1. FPL results of the modified compounds versus PF-07321332 (nirmatrelvir).

| Source             | N <sup>0</sup> | Code               | $F_{\text{Max}}$ | $W$         | $\Delta G_{\text{FPL}}^{\text{Pre a}}$ |
|--------------------|----------------|--------------------|------------------|-------------|----------------------------------------|
|                    |                | <b>PF-07321332</b> | 788.3 ± 38.1     | 103.7 ± 3.6 | -11.32                                 |
| <b>PF-07321332</b> | 1              | <b>PF_9b</b>       | 871.1 ± 43.7     | 122.1 ± 5.0 | -12.35                                 |
|                    | 2              | <b>PF_9a</b>       | 896.9 ± 55.5     | 119.8 ± 8.2 | -12.22                                 |
|                    | 3              | <b>PF_3</b>        | 890.7 ± 48.4     | 116.0 ± 4.3 | -12.01                                 |
|                    | 4              | <b>PF_35</b>       | 776.6 ± 61.3     | 115.4 ± 8.0 | -11.97                                 |
|                    | 5              | <b>PF_12</b>       | 759.7 ± 15.5     | 107.3 ± 3.0 | -11.52                                 |
|                    | 6              | <b>PF_33</b>       | 779.0 ± 56.3     | 104.5 ± 5.8 | -11.37                                 |
|                    | 7              | <b>PF_34</b>       | 787.6 ± 55.8     | 103.7 ± 6.8 | -11.32                                 |
|                    | 8              | <b>PF_2</b>        | 763.7 ± 69.0     | 97.5 ± 4.8  | -10.97                                 |
|                    | 9              | <b>PF_14</b>       | 689.8 ± 26.6     | 94.3 ± 4.7  | -10.79                                 |

Table S2. FPL results of the modified compounds.

| Source       | N <sup>0</sup> | Code            | $F_{\text{Max}}$ | $W$         | $\Delta G_{\text{FPL}}^{\text{Pre a}}$ |
|--------------|----------------|-----------------|------------------|-------------|----------------------------------------|
| <b>PF_9b</b> | 1              | <b>PF_9b_3</b>  | 730.9 ± 26.1     | 113.6 ± 3.4 | -11.87                                 |
|              | 2              | <b>PF_9b_13</b> | 788.2 ± 15.7     | 105.1 ± 1.9 | -11.40                                 |
| <b>PF_9a</b> | 1              | <b>PF_9a_33</b> | 882.6 ± 56.9     | 130.1 ± 7.3 | -12.80                                 |
|              | 2              | <b>PF_9a_11</b> | 849.2 ± 18.2     | 117.3 ± 4.2 | -12.08                                 |
|              | 3              | <b>PF_9a_32</b> | 781.5 ± 33.0     | 113.5 ± 5.3 | -11.87                                 |
|              | 4              | <b>PF_9a_2</b>  | 803.9 ± 58.9     | 112.4 ± 4.0 | -11.81                                 |
|              | 5              | <b>PF_9a_13</b> | 669.9 ± 21.5     | 92.0 ± 3.2  | -10.67                                 |
| <b>PF_3</b>  | 1              | <b>PF_3_4</b>   | 827.5 ± 35.0     | 116.3 ± 2.7 | -12.03                                 |
|              | 2              | <b>PF_3_34</b>  | 852.9 ± 35.1     | 114.9 ± 3.4 | -11.95                                 |
|              | 3              | <b>PF_3_2</b>   | 764.6 ± 56.8     | 104.5 ± 5.0 | -11.36                                 |
|              | 4              | <b>PF_3_13</b>  | 713.8 ± 30.2     | 98.30 ± 4.7 | -11.02                                 |
| <b>PF_35</b> | 1              | <b>PF_35_14</b> | 627.1 ± 29.8     | 92.0 ± 3.8  | -10.66                                 |
| <b>PF_12</b> | 1              | <b>PF_12_33</b> | 869.2 ± 6.6      | 121.9 ± 1.6 | -12.34                                 |
|              | 2              | <b>PF_12_9</b>  | 877.5 ± 42.9     | 116.5 ± 5.0 | -12.04                                 |
|              | 3              | <b>PF_12_3</b>  | 836.7 ± 42.5     | 114.6 ± 6.4 | -11.93                                 |
|              | 4              | <b>PF_12_32</b> | 833.3 ± 28.6     | 113.2 ± 4.2 | -11.85                                 |
|              | 5              | <b>PF_12_34</b> | 842.0 ± 44.8     | 112.0 ± 3.5 | -11.79                                 |
|              | 6              | <b>PF_12_13</b> | 654.9 ± 22.2     | 88.4 ± 2.3  | -10.46                                 |

Table S3. FPL results of the modified compounds.

| Source          | N <sup>0</sup> | Code               | $F_{\text{Max}}$ | $W$         | $\Delta G_{\text{FPL}}^{\text{Pre a}}$ |
|-----------------|----------------|--------------------|------------------|-------------|----------------------------------------|
| <b>PF_9a_33</b> | 1              | <b>PF_9a_33_13</b> | 828.4 ± 14.4     | 121.0 ± 2.6 | -12.29                                 |
|                 | 2              | <b>PF_9a_33_2</b>  | 787.7 ± 47.7     | 107.3 ± 6.2 | -11.52                                 |
|                 | 3              | <b>PF_9a_33_3</b>  | 806.5 ± 10.4     | 101.3 ± 5.1 | -11.18                                 |
|                 | 4              | <b>PF_9a_33_32</b> | 689.0 ± 36.5     | 95.3 ± 6.0  | -10.85                                 |
| <b>PF_3_4</b>   | 1              | <b>PF_3_4_62</b>   | 1032.2 ± 33.5    | 146.5 ± 5.2 | -13.71                                 |
|                 | 2              | <b>PF_3_4_32</b>   | 978.9 ± 57.6     | 144.5 ± 4.1 | -13.60                                 |
|                 | 3              | <b>PF_3_4_7</b>    | 957.6 ± 44.0     | 131.2 ± 3.0 | -12.86                                 |
|                 | 4              | <b>PF_3_4_33</b>   | 922.9 ± 28.1     | 128.5 ± 3.4 | -12.70                                 |
|                 | 5              | <b>PF_3_4_31</b>   | 908.5 ± 30.7     | 124.5 ± 4.6 | -12.48                                 |
|                 | 6              | <b>PF_3_4_12</b>   | 811.6 ± 5.6      | 113.6 ± 2.0 | -11.87                                 |
|                 | 7              | <b>PF_3_4_10</b>   | 717.1 ± 35.8     | 101.8 ± 2.1 | -11.21                                 |
| <b>PF_12_33</b> | 1              | <b>PF_12_33_3</b>  | 882.7 ± 12.2     | 125.4 ± 5.5 | -12.53                                 |
|                 | 2              | <b>PF_12_33_9</b>  | 839.7 ± 68.3     | 118.0 ± 9.6 | -12.12                                 |
|                 | 3              | <b>PF_12_33_32</b> | 802.0 ± 47.3     | 115.2 ± 3.0 | -11.96                                 |
|                 | 4              | <b>PF_12_33_33</b> | 816.6 ± 41.5     | 106.3 ± 5.0 | -11.47                                 |
|                 | 5              | <b>PF_12_33_5</b>  | 706.9 ± 49.0     | 105.7 ± 1.7 | -11.43                                 |
| <b>PF_12_9</b>  | 1              | <b>PF_12_9_31</b>  | 940.2 ± 15.4     | 133.5 ± 2.2 | -12.99                                 |
|                 | 2              | <b>PF_12_9_3</b>   | 906.7 ± 34.0     | 125.8 ± 4.6 | -12.55                                 |
|                 | 3              | <b>PF_12_9_5</b>   | 885.3 ± 24.0     | 116.8 ± 5.2 | -12.06                                 |
|                 | 4              | <b>PF_12_9_32</b>  | 726.0 ± 44.7     | 107.3 ± 4.1 | -11.52                                 |
|                 | 5              | <b>PF_12_9_33</b>  | 760.3 ± 8.8      | 101.2 ± 2.5 | -11.18                                 |
|                 | 6              | <b>PF_12_9_12</b>  | 683.1 ± 8.6      | 97.5 ± 1.4  | -10.97                                 |
|                 | 7              | <b>PF_12_9_2</b>   | 721.8 ± 25.9     | 90.5 ± 4.0  | -10.58                                 |

**Table S4.** FPL results of the modified compounds.

| Source     | N <sup>0</sup> | Code          | F <sub>Max</sub> | W           | ΔG <sub>FPL</sub> <sup>Pre a</sup> |
|------------|----------------|---------------|------------------|-------------|------------------------------------|
| PF_3_4_62  | 1              | PF_3_4_62_33  | 927.7 ± 28.0     | 122.6 ± 4.2 | -12.38                             |
|            | 2              | PF_3_4_62_12  | 785.7 ± 32.5     | 101.8 ± 6.3 | -11.21                             |
|            | 3              | PF_3_4_62_32  | 731.7 ± 60.3     | 100.4 ± 5.7 | -11.13                             |
|            | 4              | PF_3_4_62_10  | 661.4 ± 31.4     | 86.7 ± 4.1  | -10.37                             |
| PF_3_4_32  | 1              | PF_3_4_32_32  | 911.3 ± 24.8     | 126.3 ± 3.8 | -12.58                             |
|            | 2              | PF_3_4_32_10  | 837.0 ± 60.4     | 121.1 ± 7.1 | -12.30                             |
| PF_3_4_7   | 1              | PF_3_4_7_30   | 792.3 ± 66.8     | 119.4 ± 8.1 | -12.20                             |
|            | 2              | PF_3_4_7_9    | 792.7 ± 26.7     | 103.5 ± 6.9 | -11.31                             |
|            | 3              | PF_3_4_7_31   | 640.4 ± 38.9     | 89.9 ± 2.5  | -10.55                             |
|            | 4              | PF_3_4_7_32   | 660.3 ± 28.9     | 89.6 ± 5.8  | -10.53                             |
|            | 5              | PF_3_4_7_11   | 611.1 ± 43.3     | 76.1 ± 4.3  | -9.77                              |
| PF_3_4_33  | 1              | PF_3_4_33_32  | 927.2 ± 39.3     | 142.2 ± 6.2 | -13.47                             |
|            | 2              | PF_3_4_33_31  | 908.0 ± 63.5     | 134.7 ± 8.1 | -13.05                             |
|            | 3              | PF_3_4_33_12  | 676.8 ± 22.7     | 98.3 ± 4.1  | -11.01                             |
| PF_3_4_31  | 1              | PF_3_4_31_32  | 863.1 ± 45.1     | 123.3 ± 6.1 | -12.42                             |
|            | 2              | PF_3_4_31_10  | 795.4 ± 49.9     | 109.5 ± 4.1 | -11.65                             |
|            | 3              | PF_3_4_31_12  | 729.7 ± 51.4     | 105.4 ± 5.4 | -11.41                             |
| PF_12_33_3 | 1              | PF_12_33_3_32 | 804.3 ± 28.3     | 111.8 ± 4.0 | -11.77                             |
|            | 2              | PF_12_33_3_31 | 727.1 ± 53.1     | 100.2 ± 5.0 | -11.12                             |
|            | 3              | PF_12_33_3_8  | 691.5 ± 32.2     | 94.9 ± 4.9  | -10.83                             |
|            | 4              | PF_12_33_3_2  | 729.6 ± 21.6     | 89.9 ± 4.9  | -10.55                             |
|            | 5              | PF_12_33_3_4  | 656.4 ± 36.4     | 87.6 ± 4.6  | -10.42                             |
| PF_12_9_31 | 1              | PF_12_9_31_32 | 836.6 ± 28.1     | 126.8 ± 3.9 | -12.61                             |
|            | 2              | PF_12_9_31_3  | 829.9 ± 43.2     | 112.7 ± 5.9 | -11.82                             |
|            | 3              | PF_12_9_31_2  | 705.3 ± 29.1     | 89.6 ± 3.6  | -10.53                             |
| PF_12_9_3  | 1              | PF_12_9_3_31  | 690.2 ± 44.7     | 97.7 ± 4.0  | -10.98                             |
|            | 2              | PF_12_9_3_30  | 587.0 ± 43.2     | 87.6 ± 3.9  | -10.42                             |
|            | 3              | PF_12_9_3_32  | 569.0 ± 35.0     | 73.7 ± 4.1  | -9.64                              |
|            | 4              | PF_12_9_3_11  | 532.9 ± 40.3     | 72.9 ± 3.7  | -9.59                              |



**Table S5.** FPL results of the modified compounds.

| Source       | N <sup>0</sup> | Code            | $F_{\text{Max}}$ | $W$             | $\Delta G_{\text{FPL}}^{\text{Pre}^a}$ |
|--------------|----------------|-----------------|------------------|-----------------|----------------------------------------|
| PF_3_4_33_32 | 1              | PF_3_4_33_32_10 | $658.0 \pm 37.5$ | $95.3 \pm 5.5$  | -10.85                                 |
|              | 2              | PF_3_4_33_32_60 | $737.6 \pm 19.2$ | $95.2 \pm 2.52$ | -10.84                                 |
| PF_3_4_31    | 1              | PF_3_4_33_31_60 | $813.8 \pm 12.4$ | $105.0 \pm 1.4$ | -11.39                                 |
|              | 2              | PF_3_4_33_31_10 | $646.1 \pm 31.5$ | $95.9 \pm 3.4$  | -10.88                                 |

**Table S6.** The profile of pulling work over the ligand displacement. The calculations were repeated 4 times each system.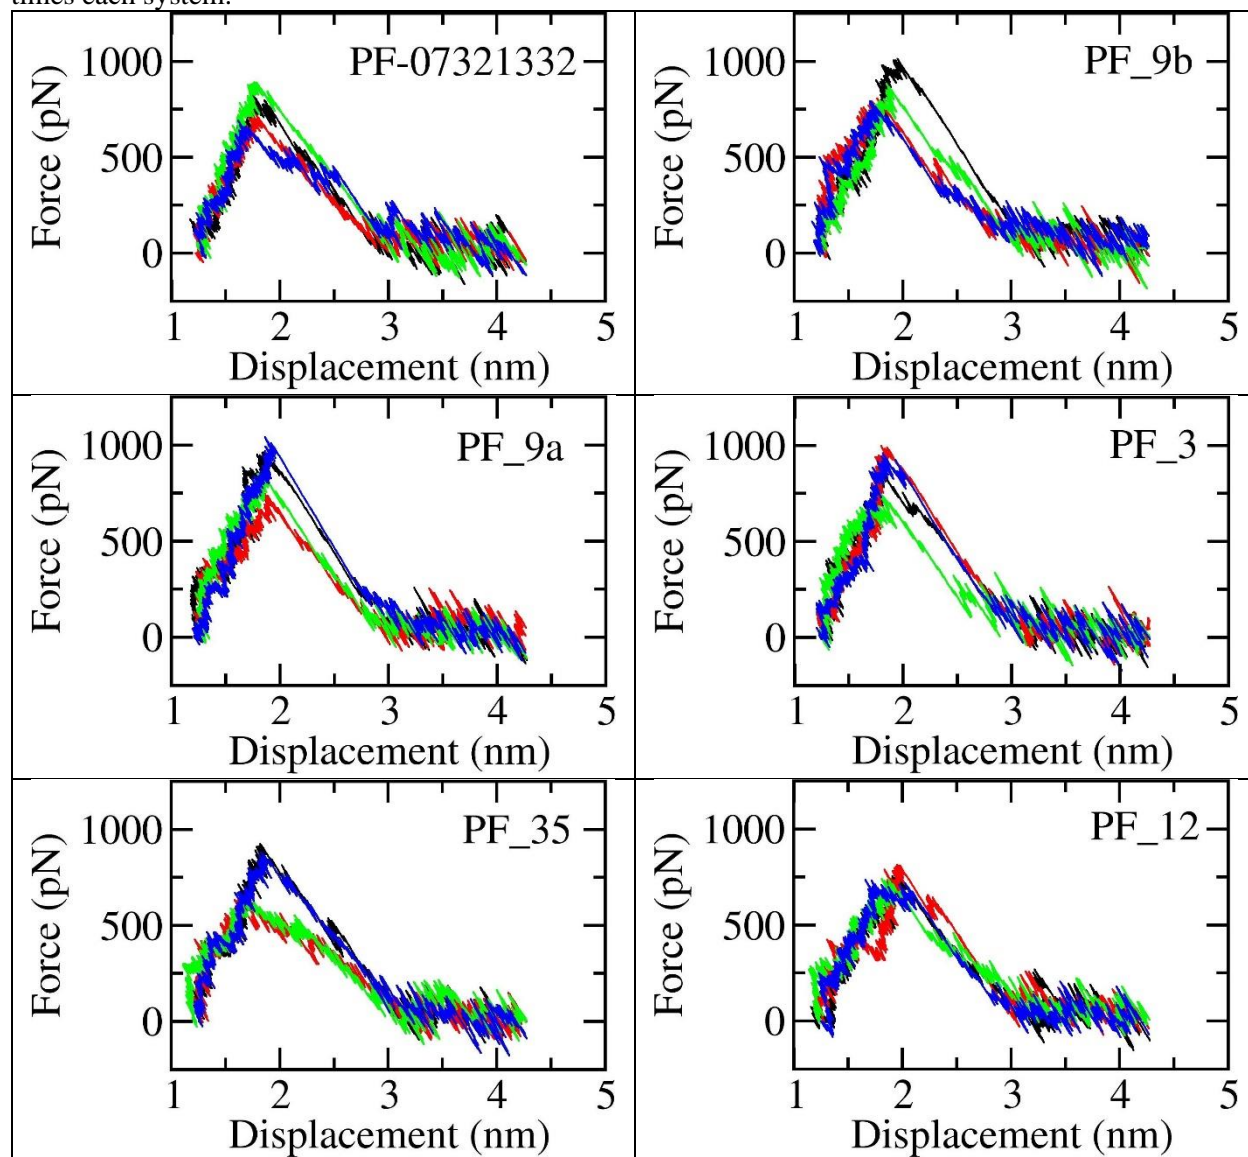

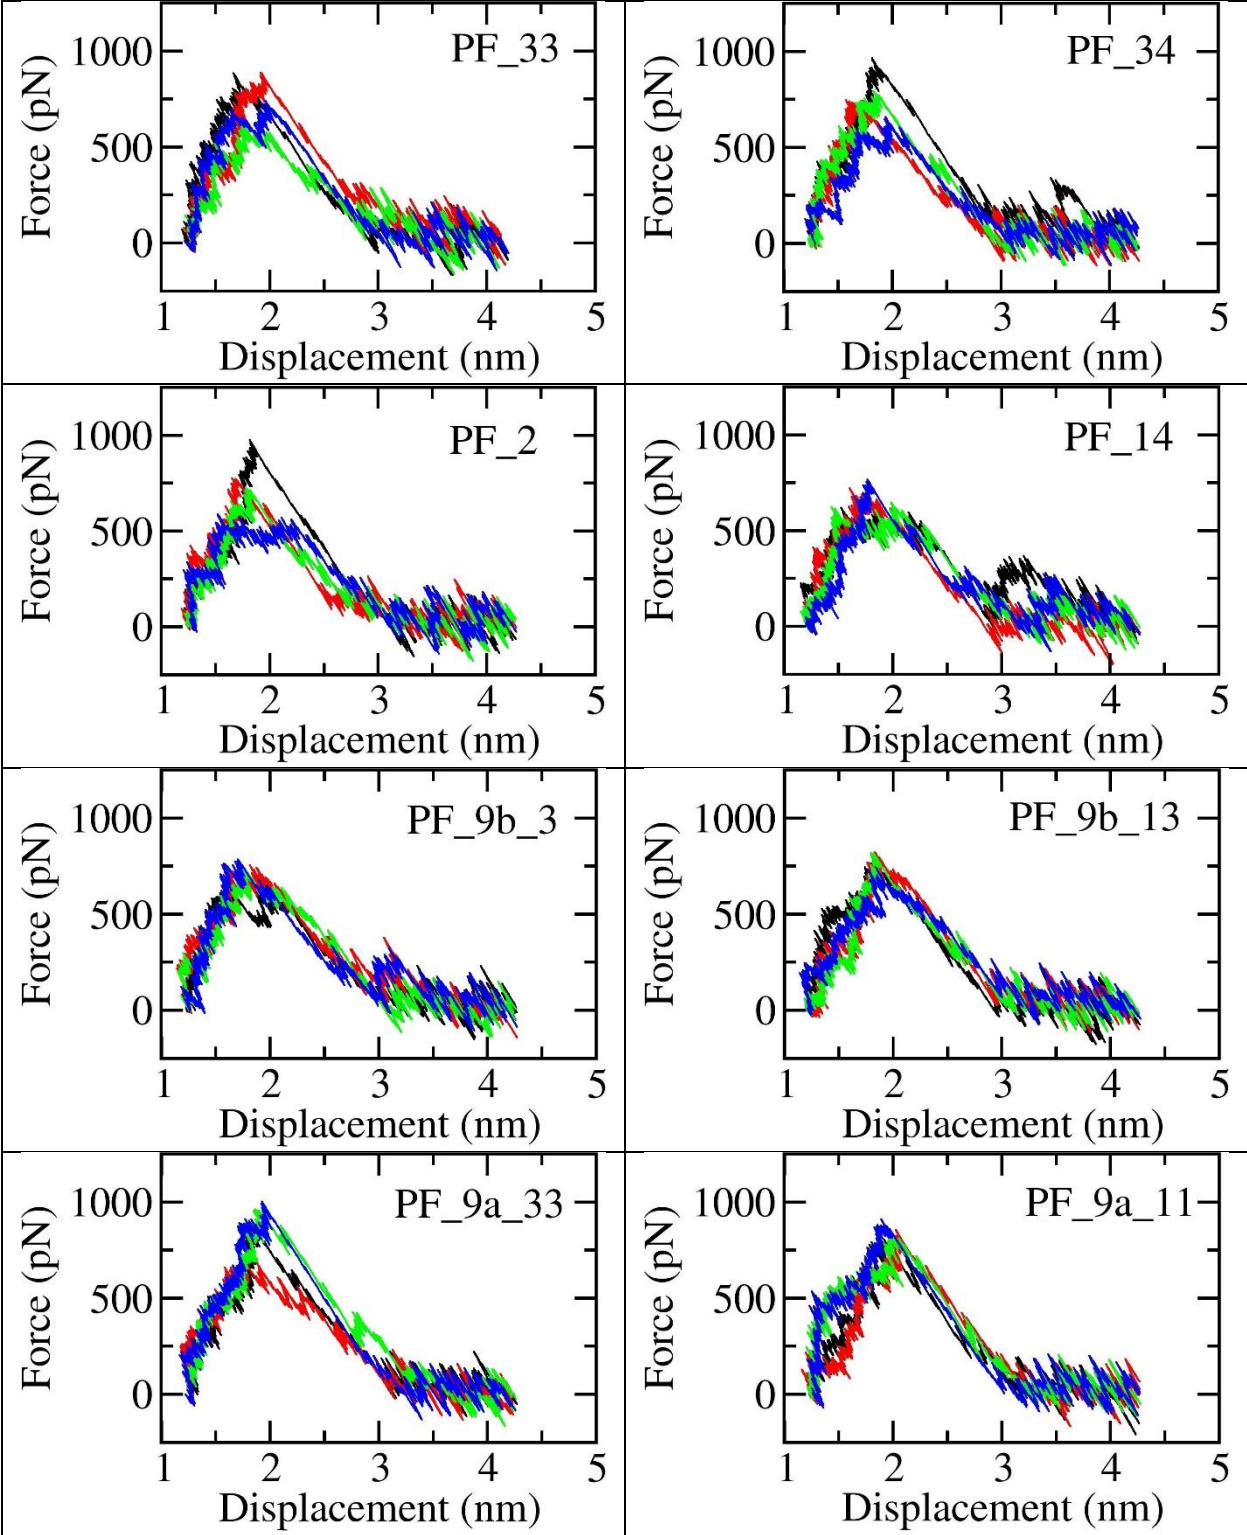

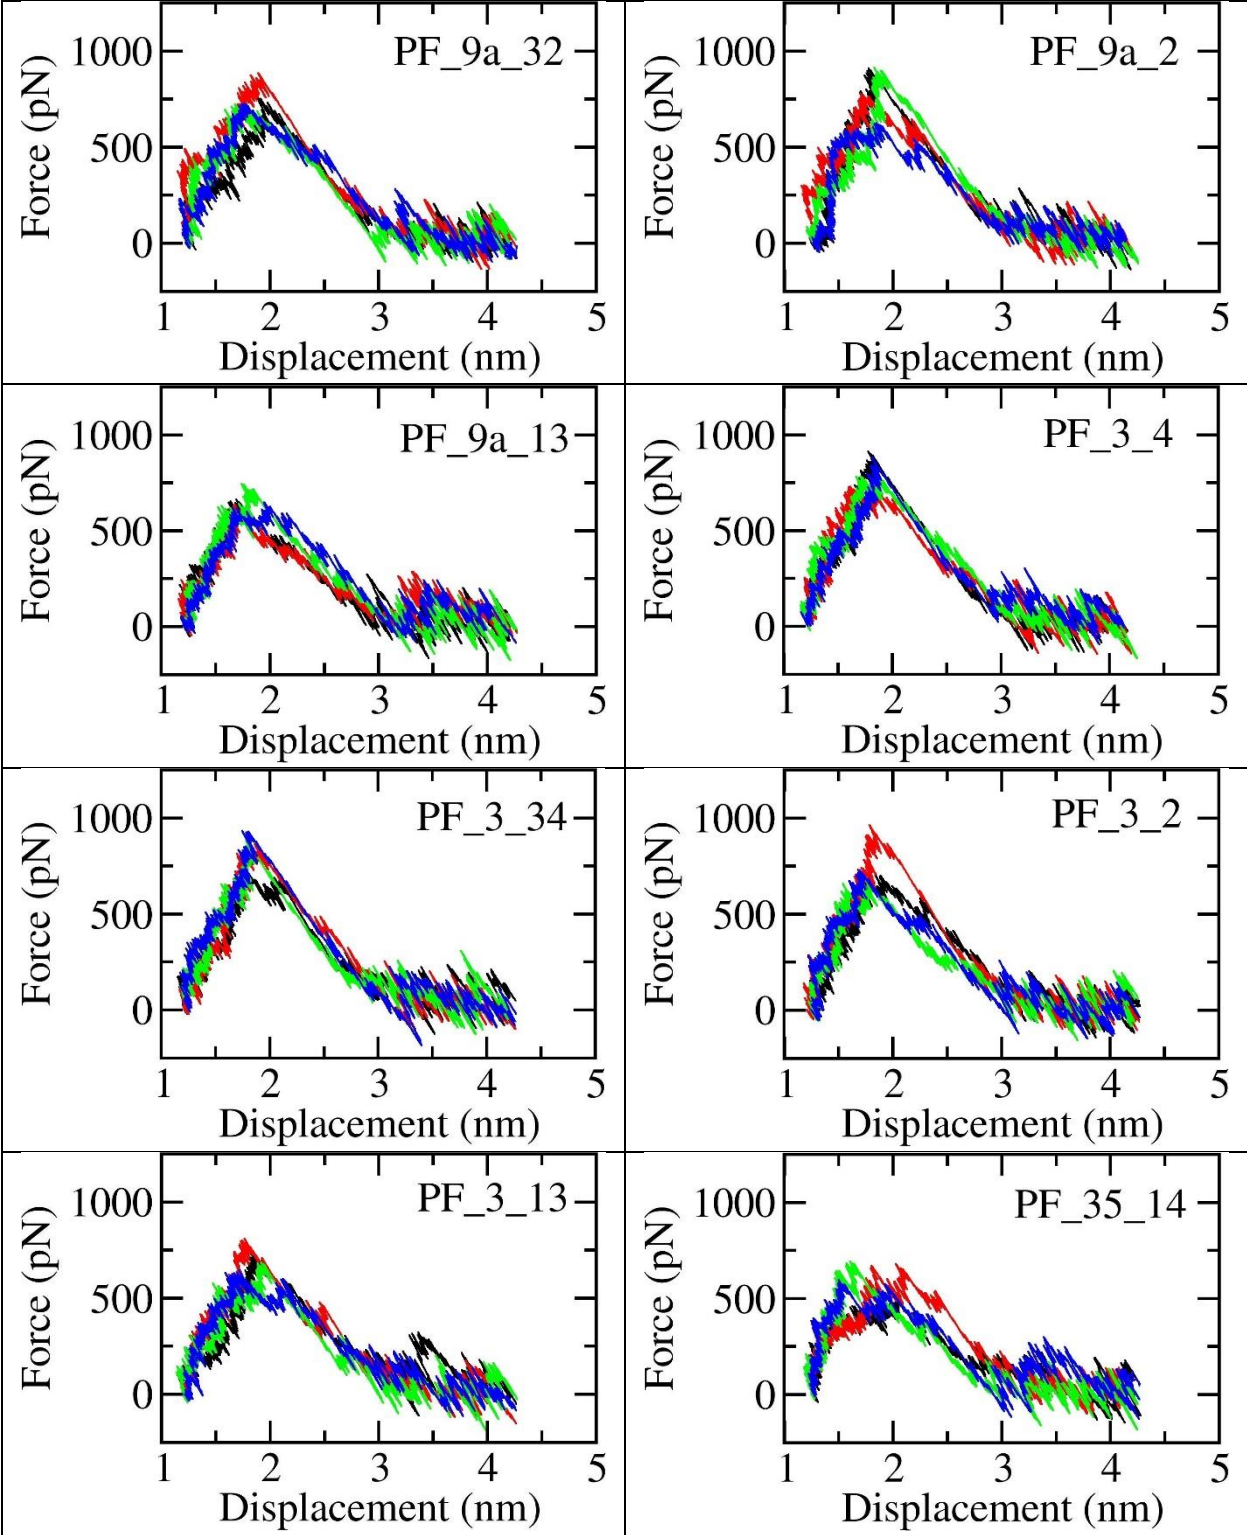

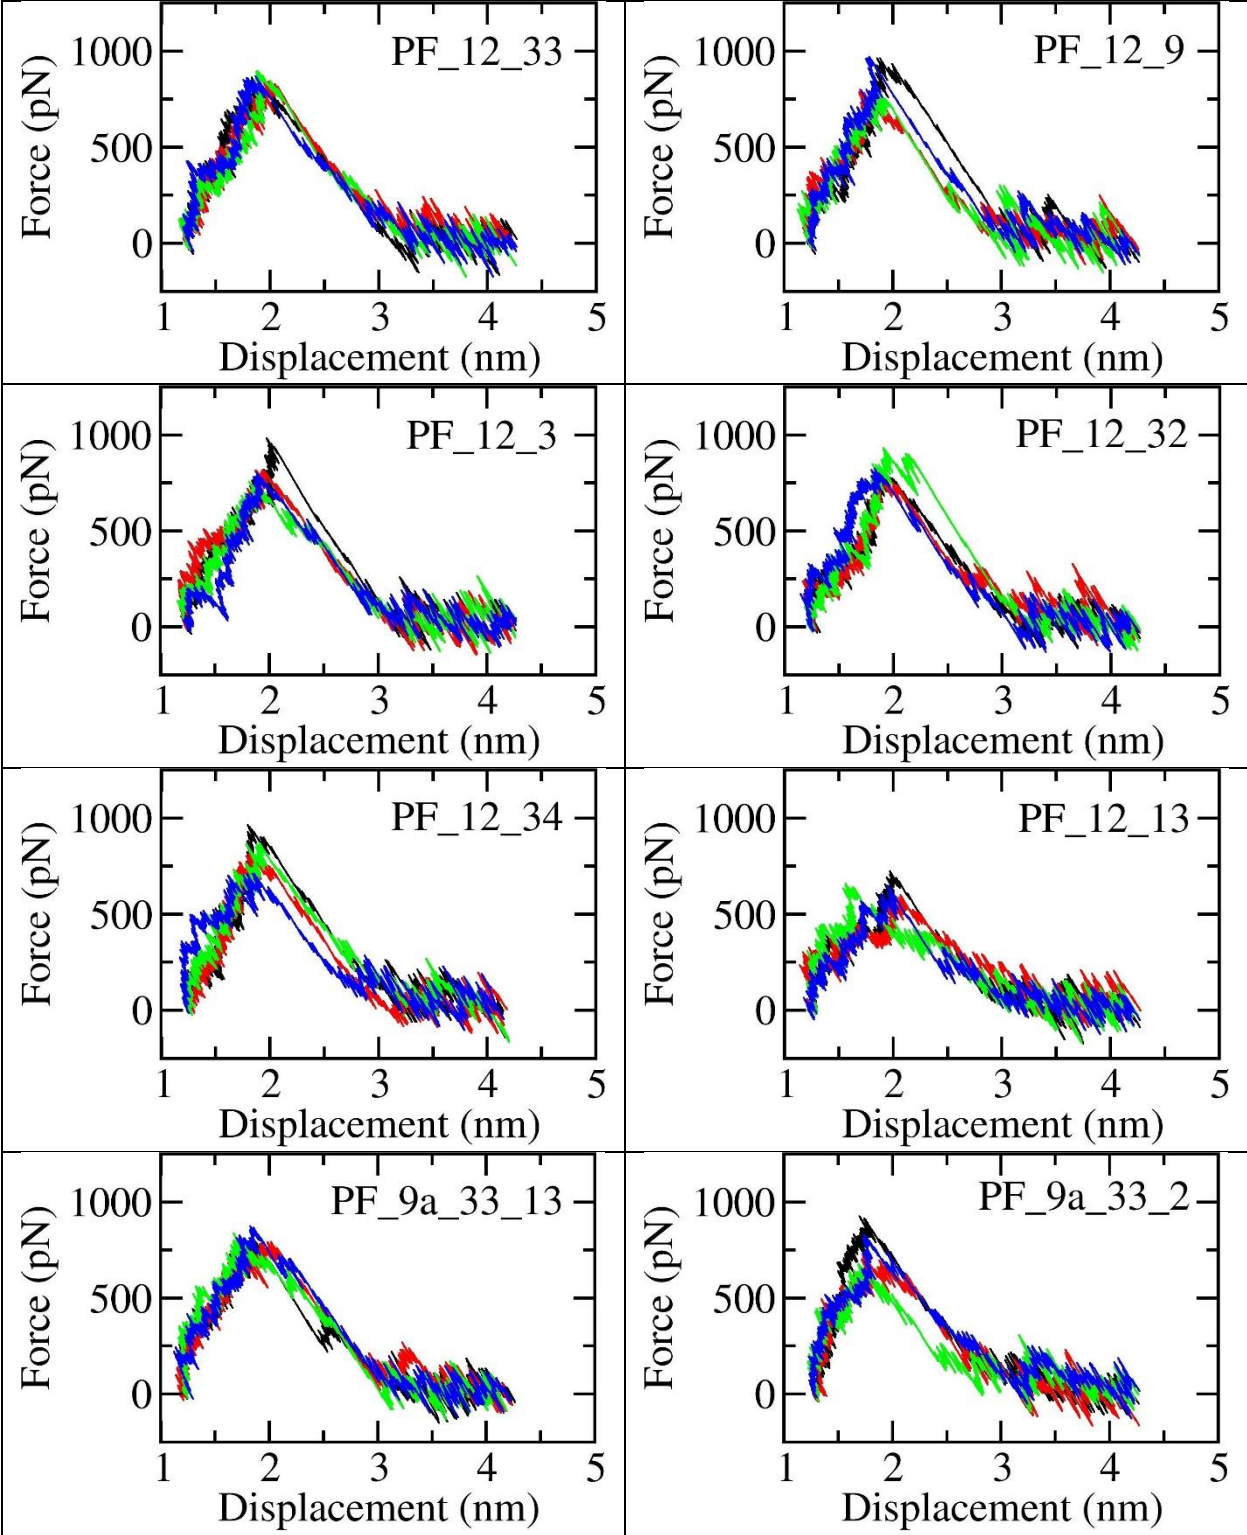



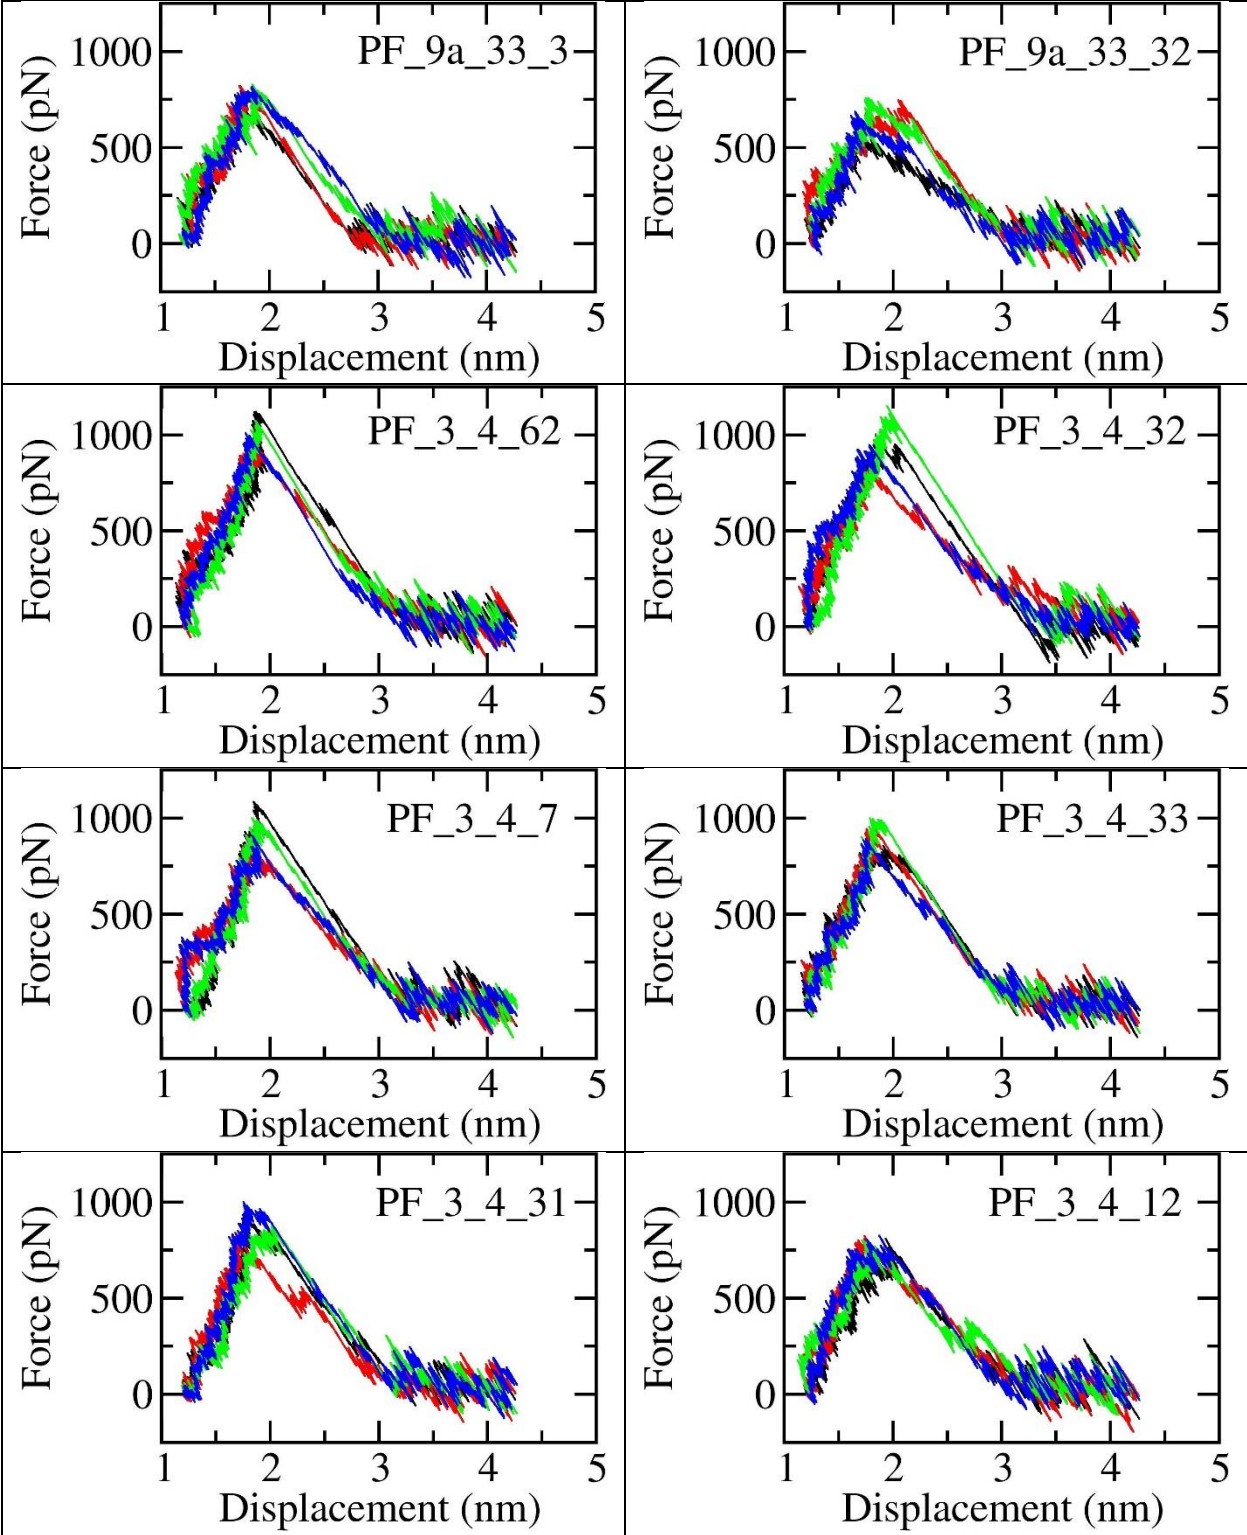

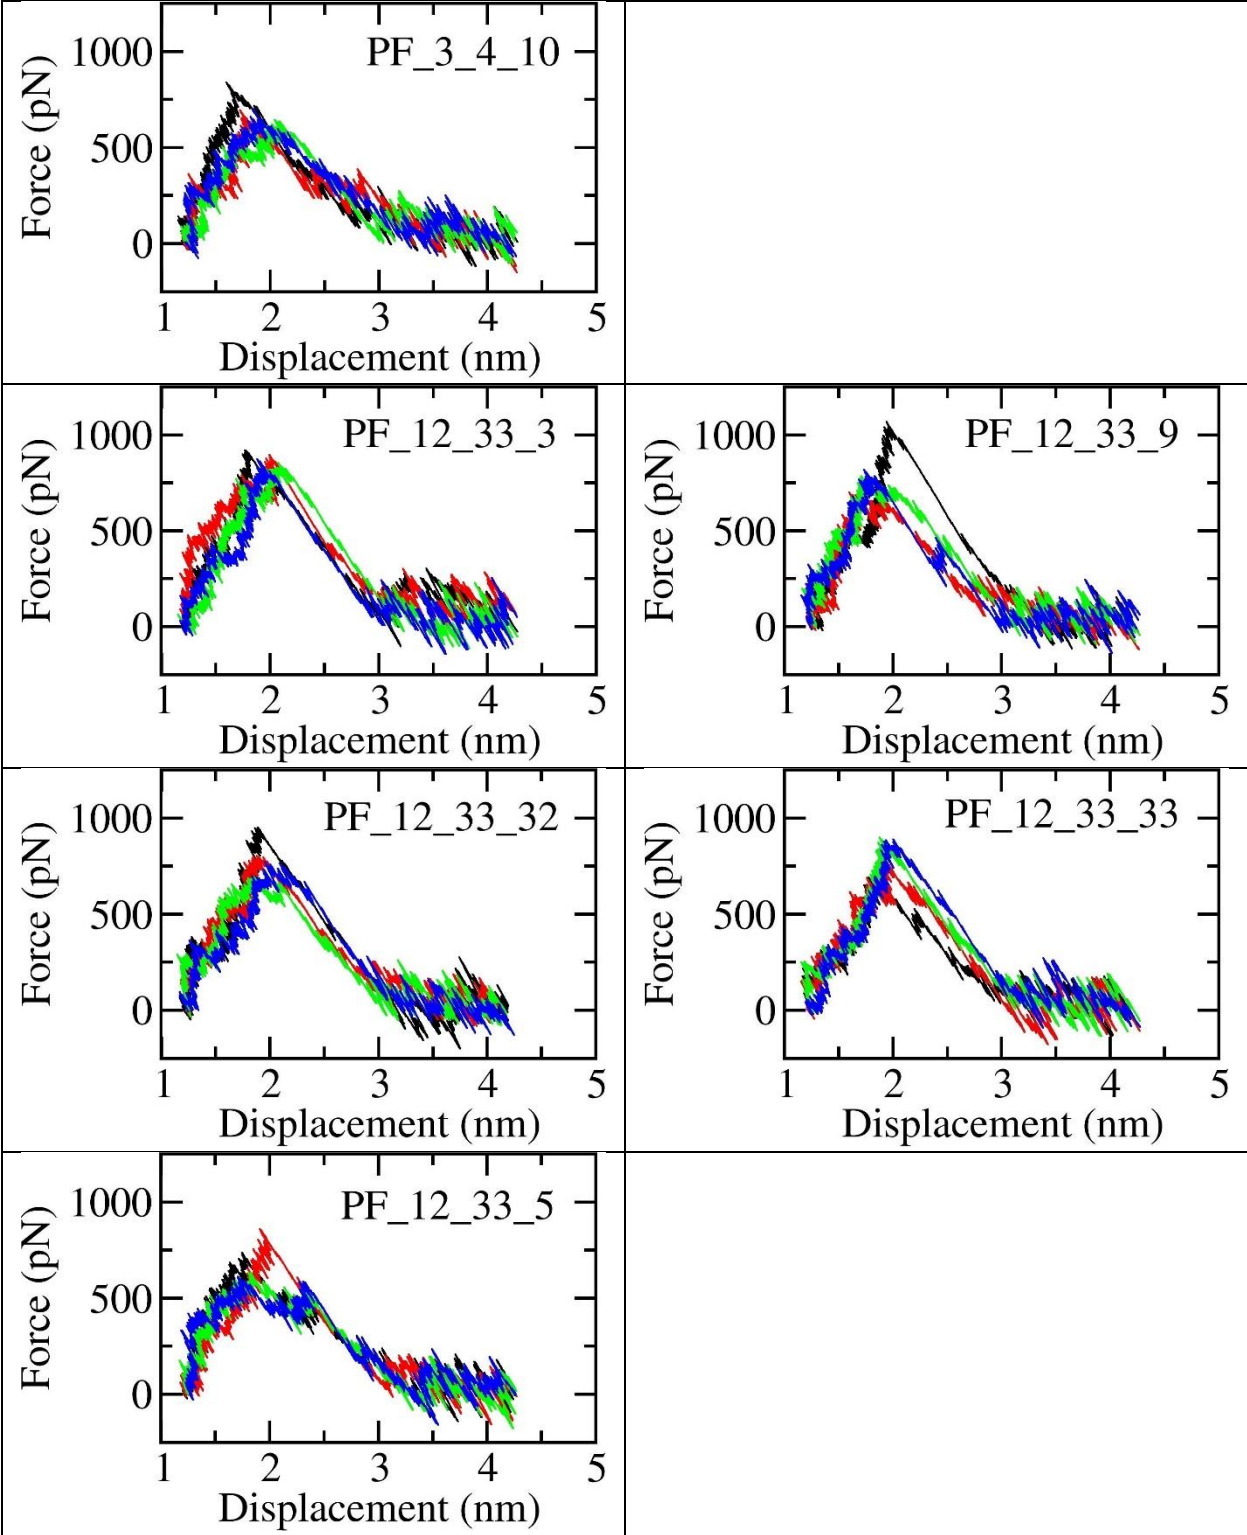

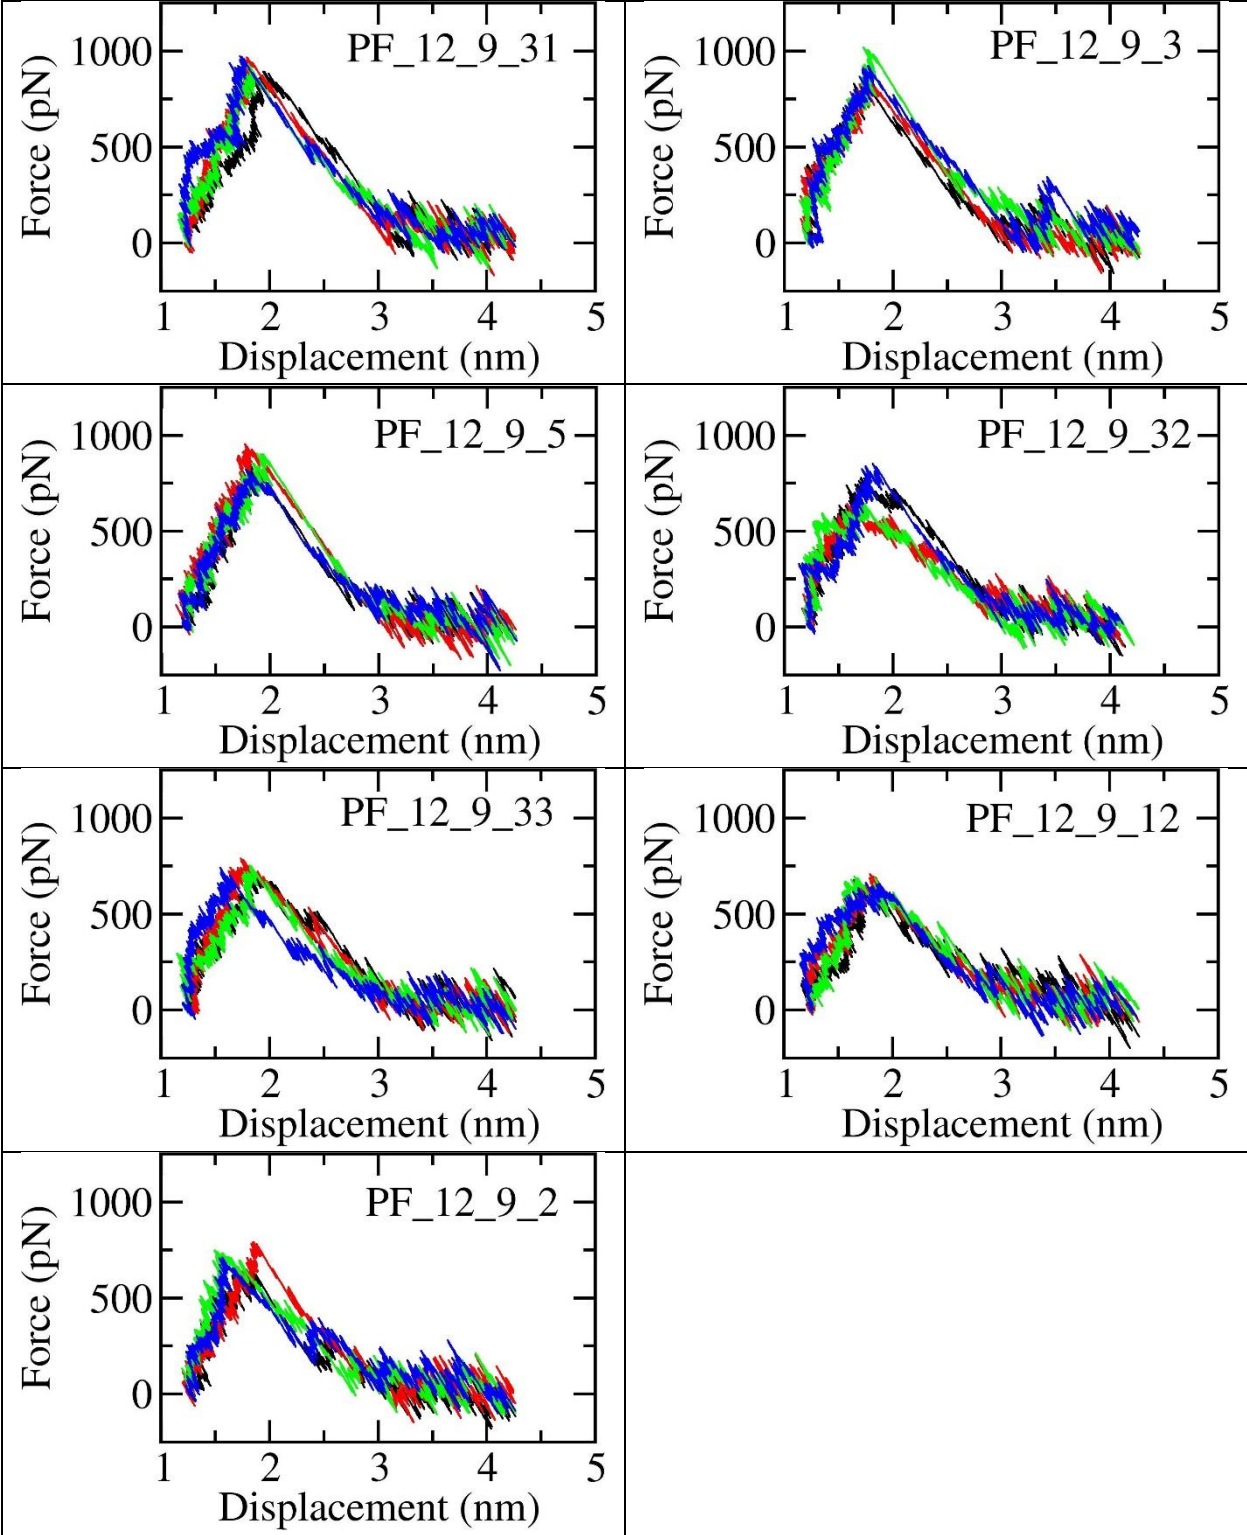

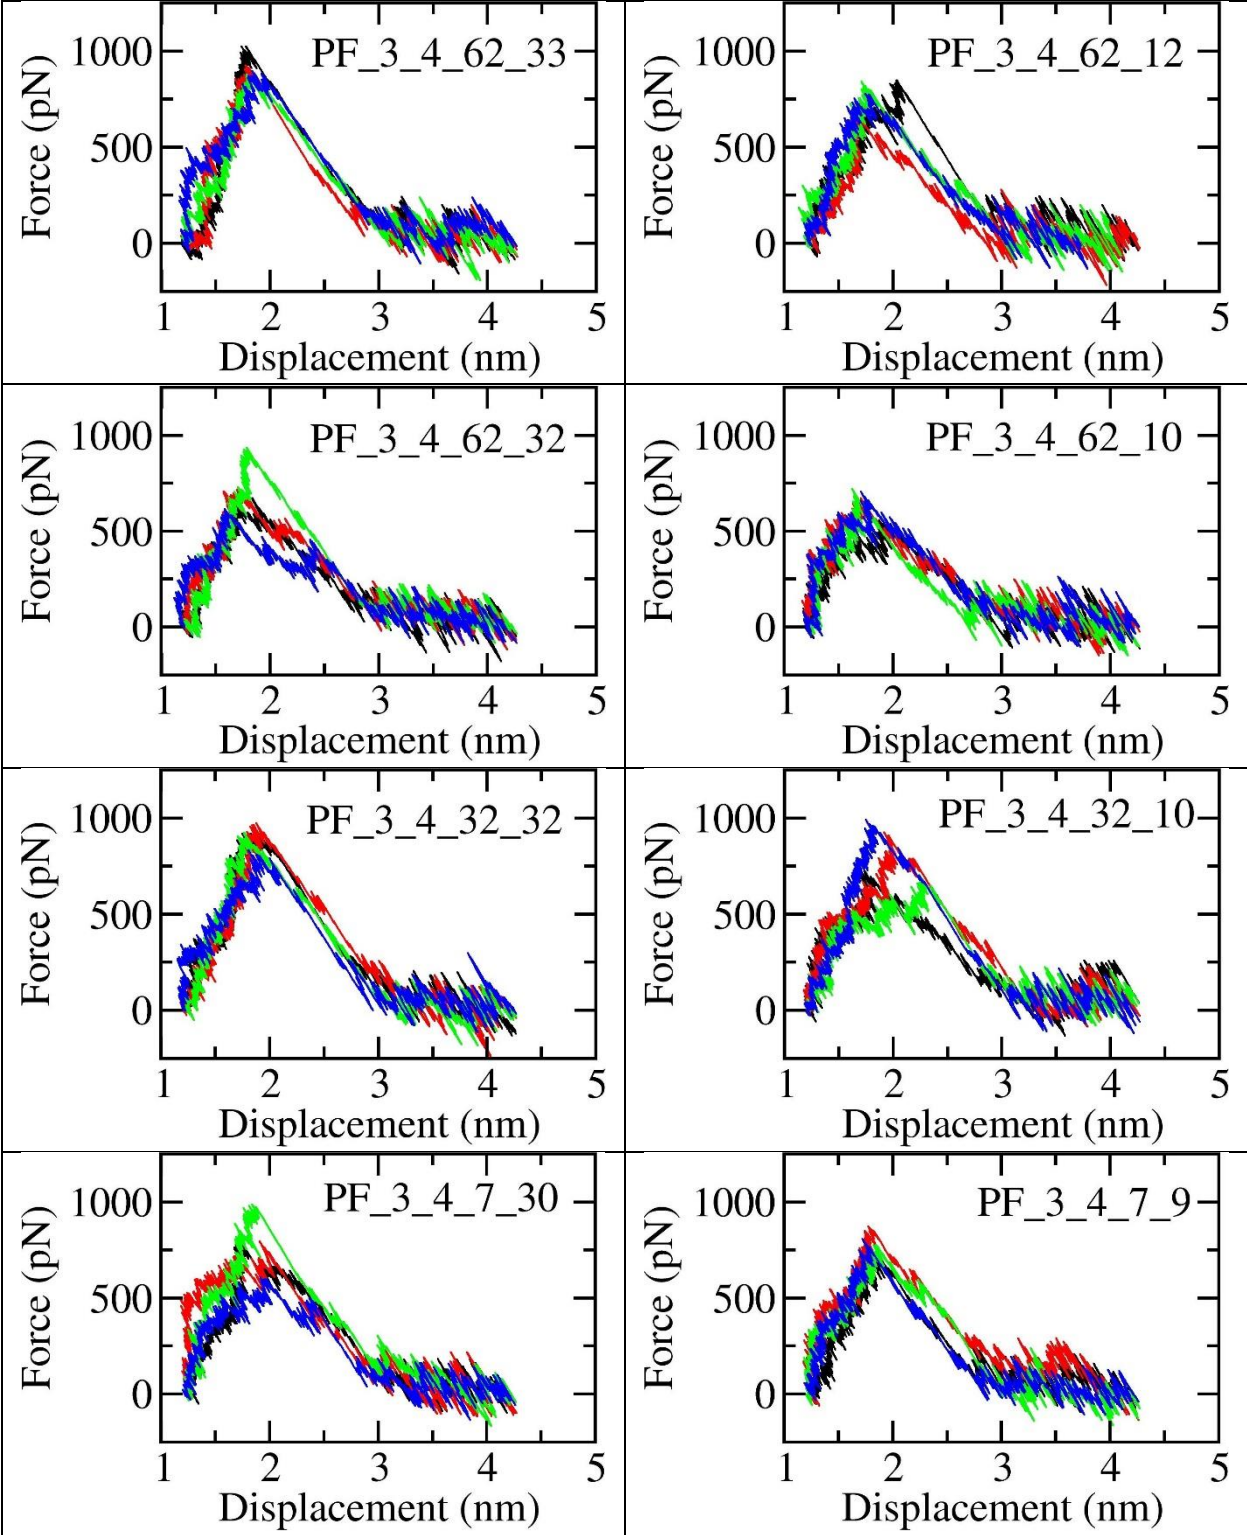



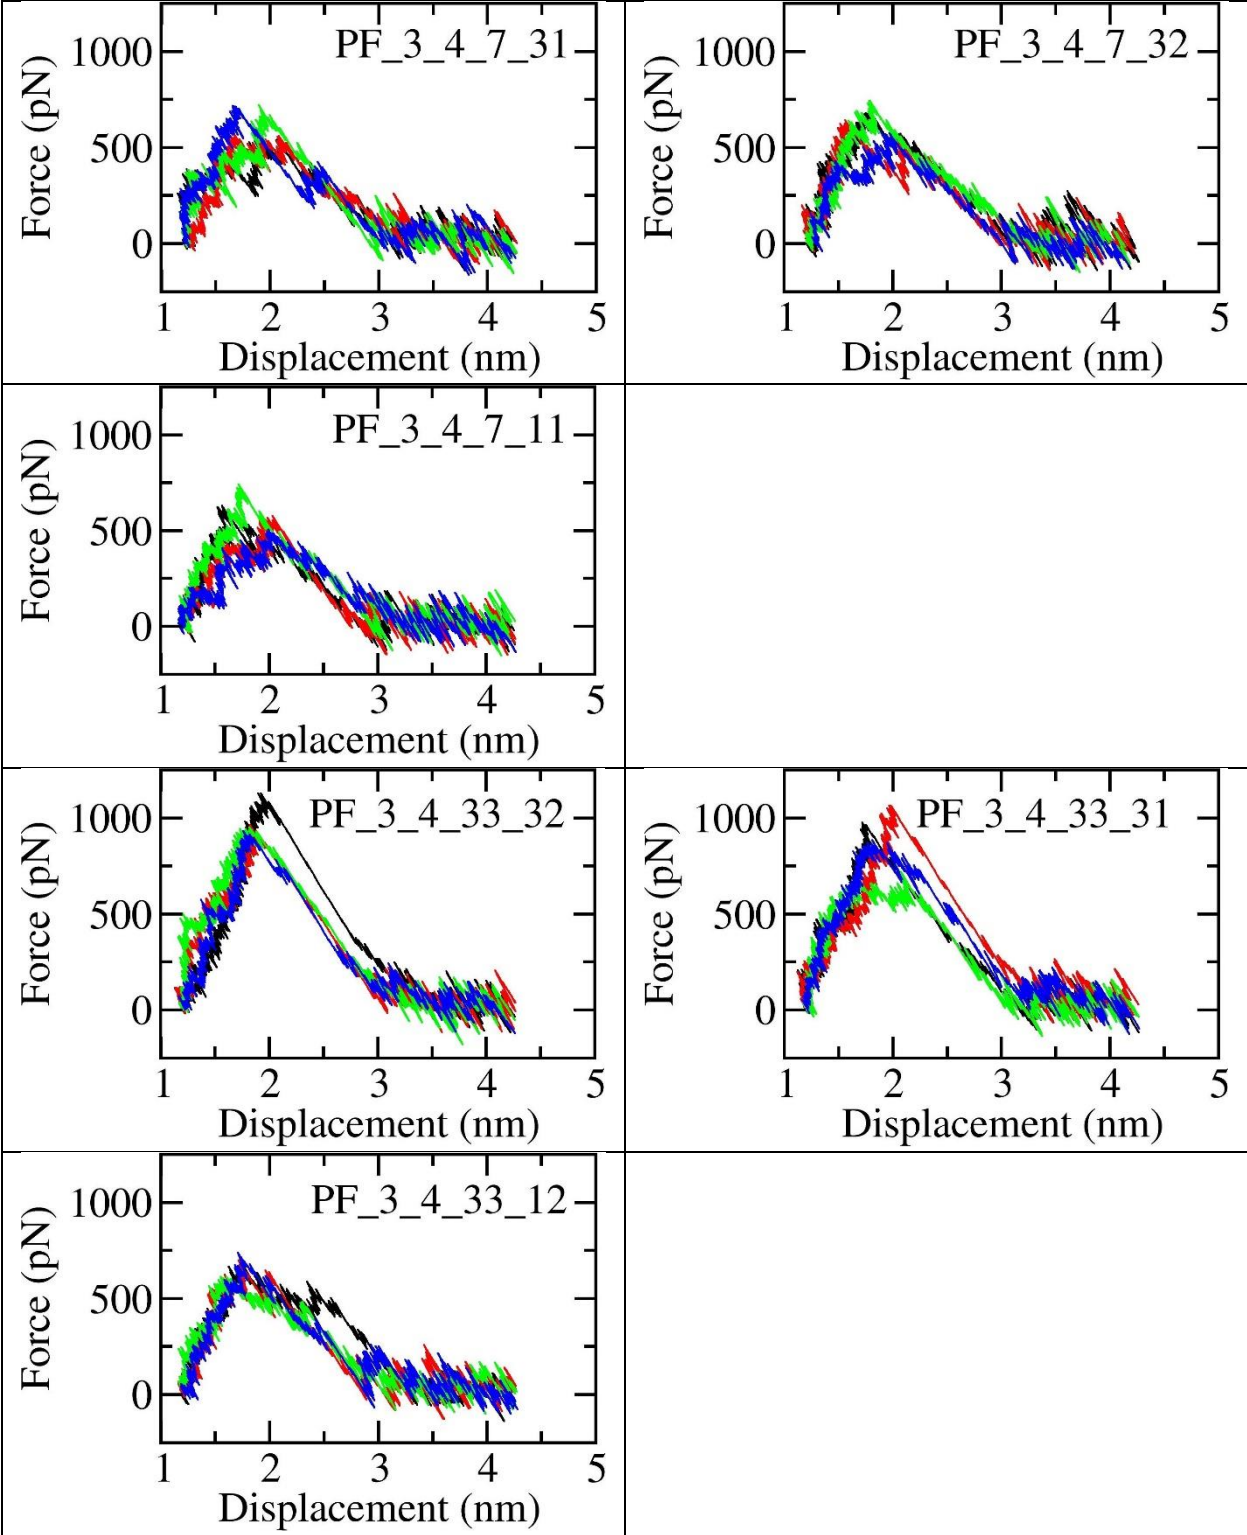

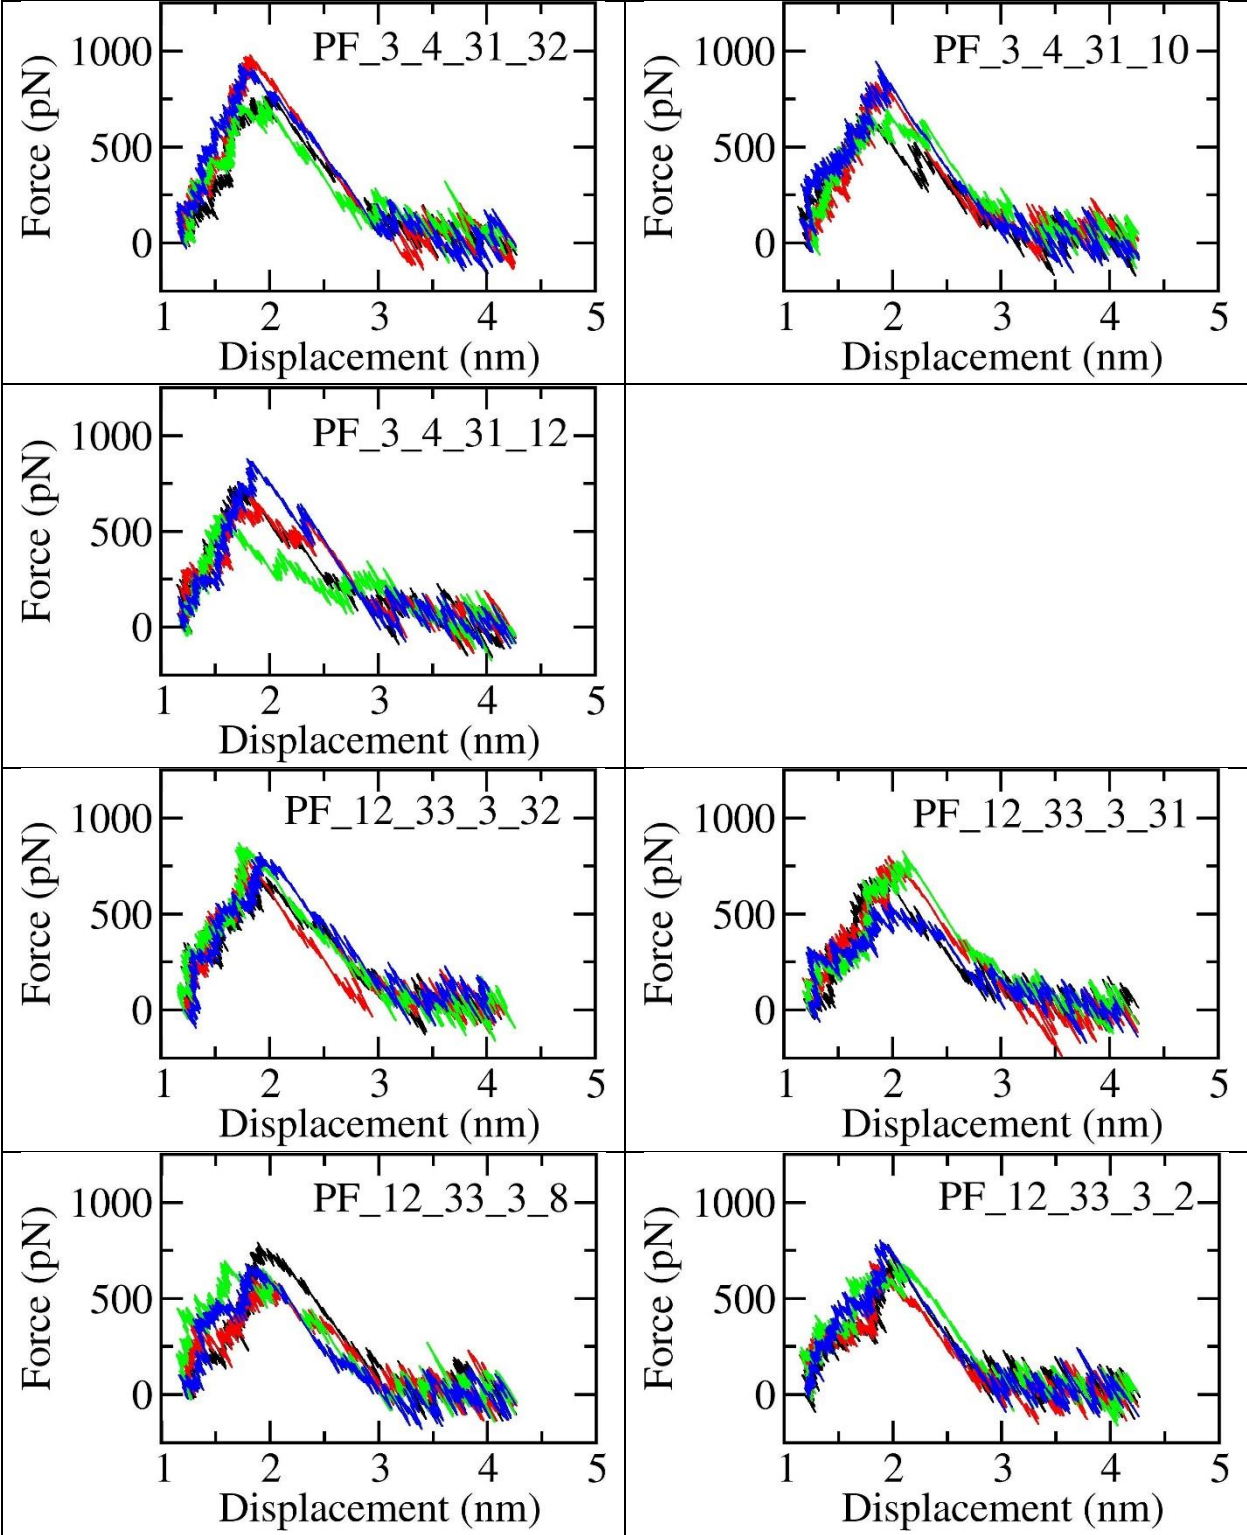



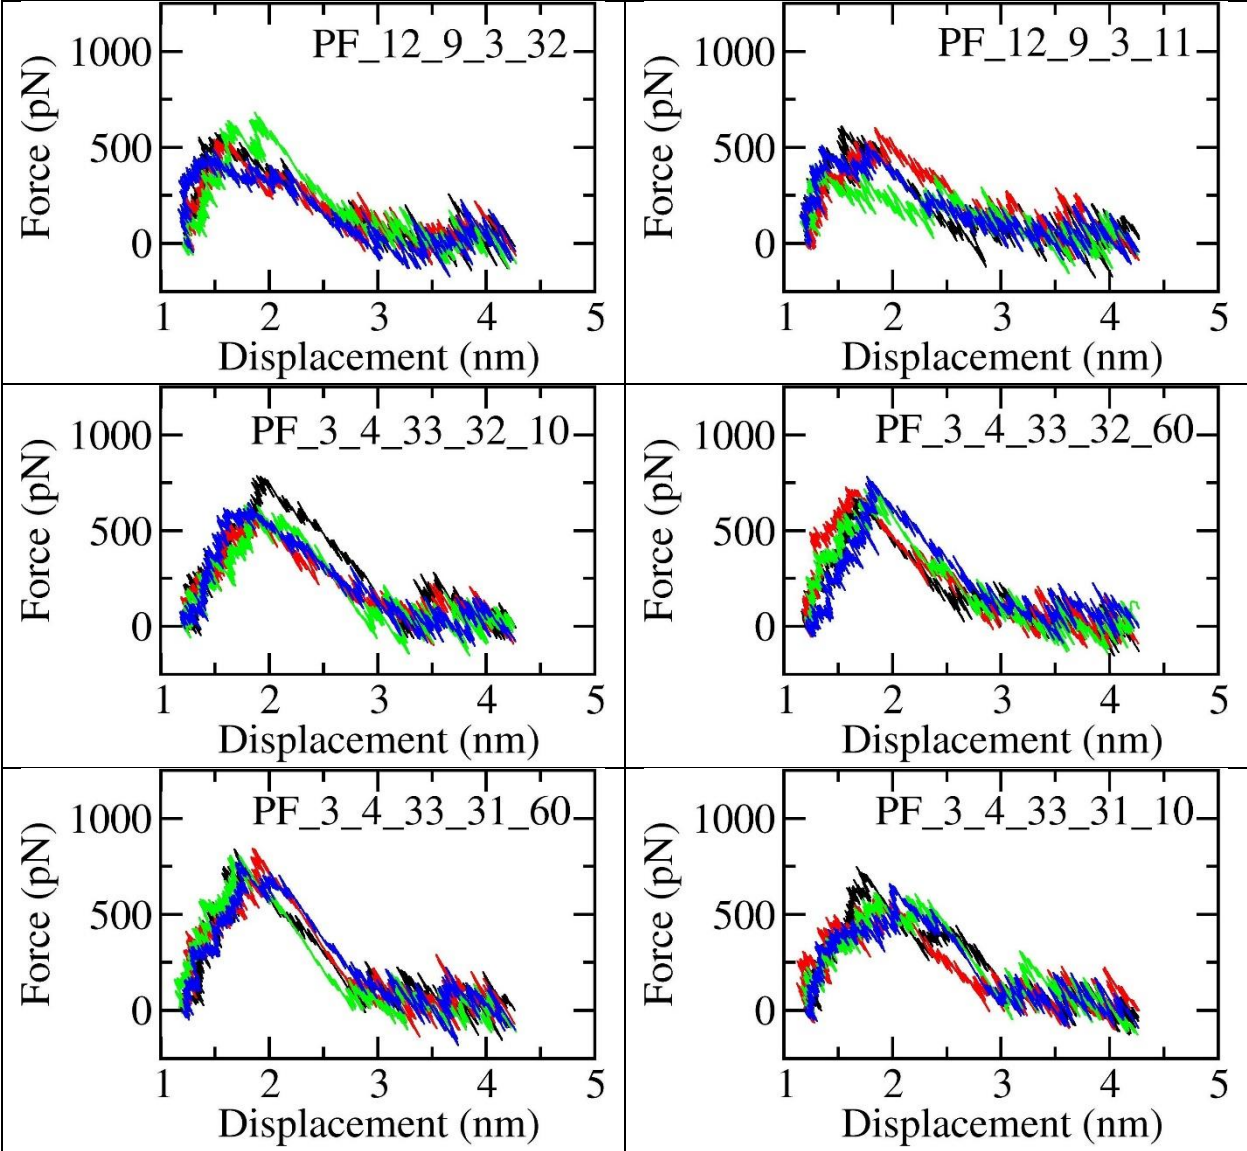



**Table S7.** The 2D interaction diagram between SARS-CoV-2 Mpro + ligand.

| N <sup>o</sup> | Name        | Initial Structure <sup>a</sup> | MD-refined structure <sup>b</sup> |
|----------------|-------------|--------------------------------|-----------------------------------|
| 1              | PF-07321332 |                                |                                   |
| 2              | PF_9b       |                                |                                   |
| 3              | PF_9a       |                                |                                   |

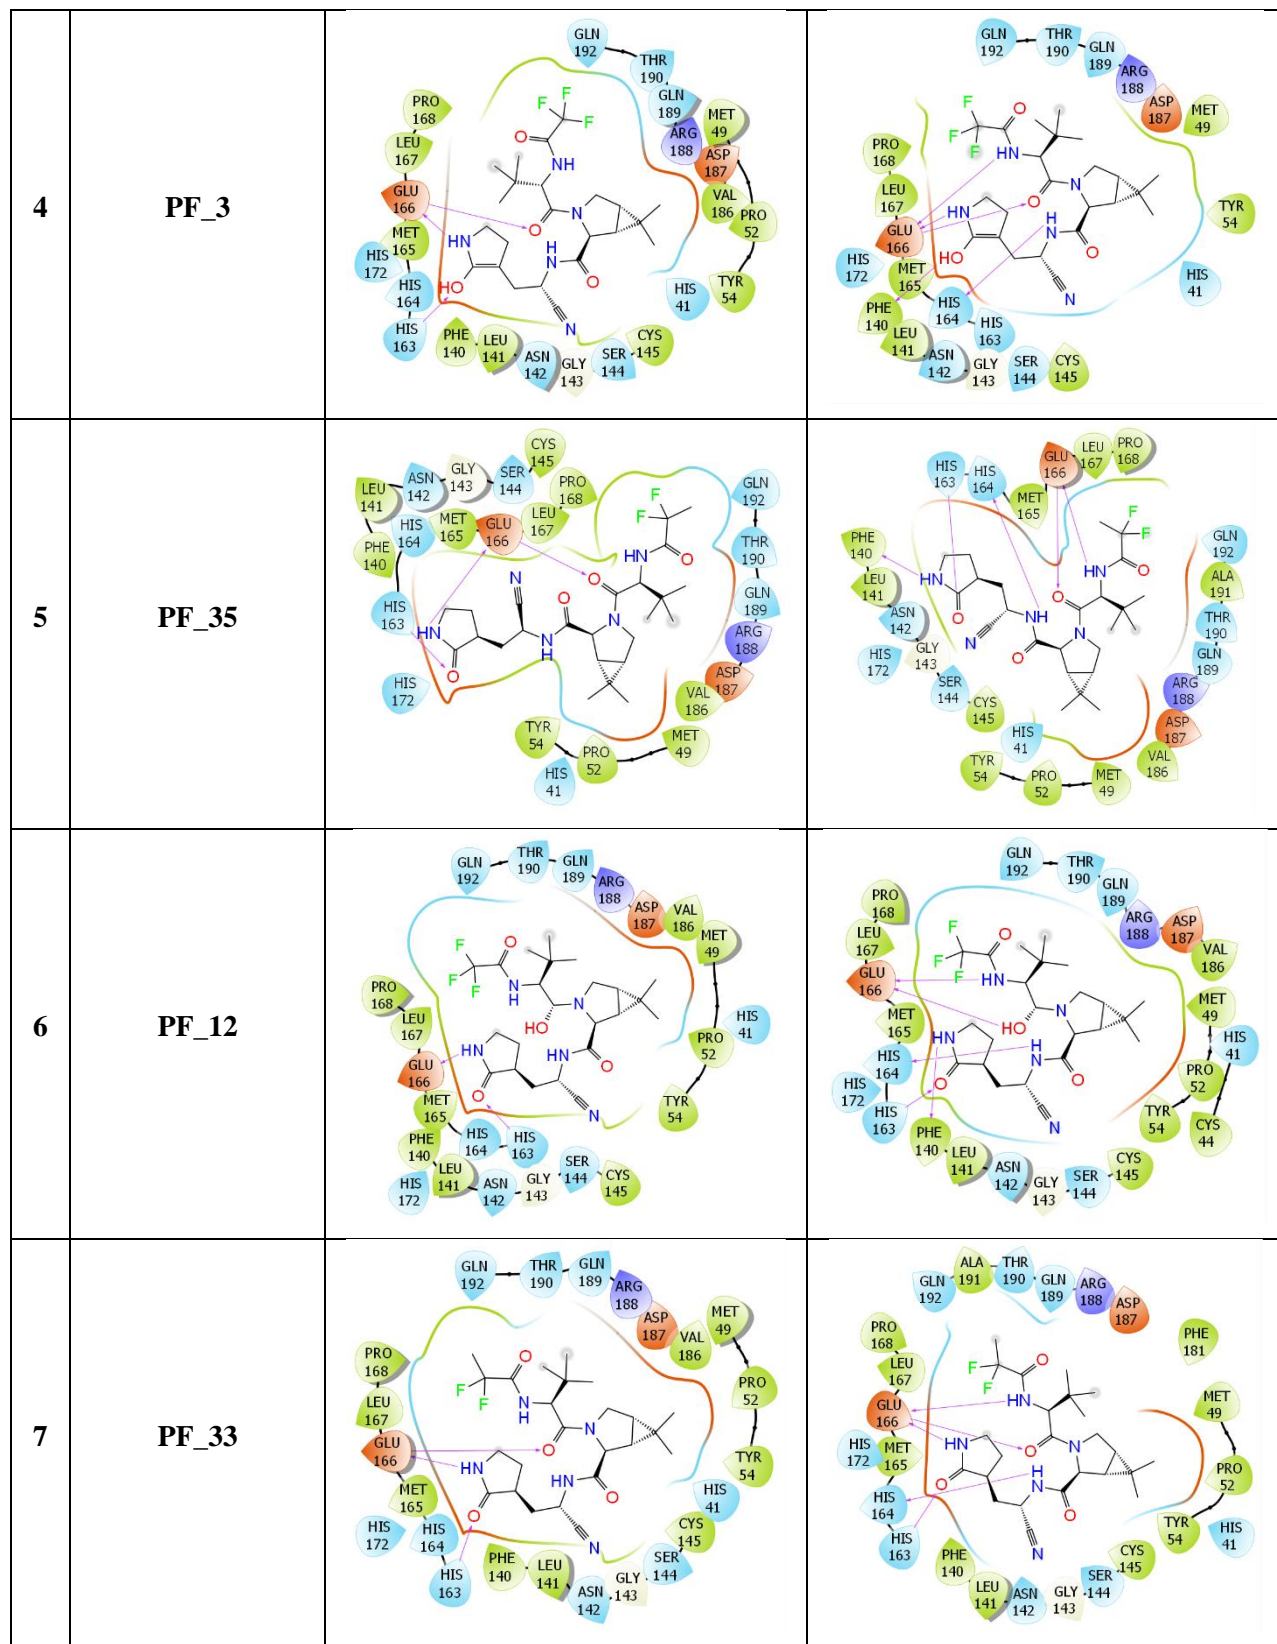

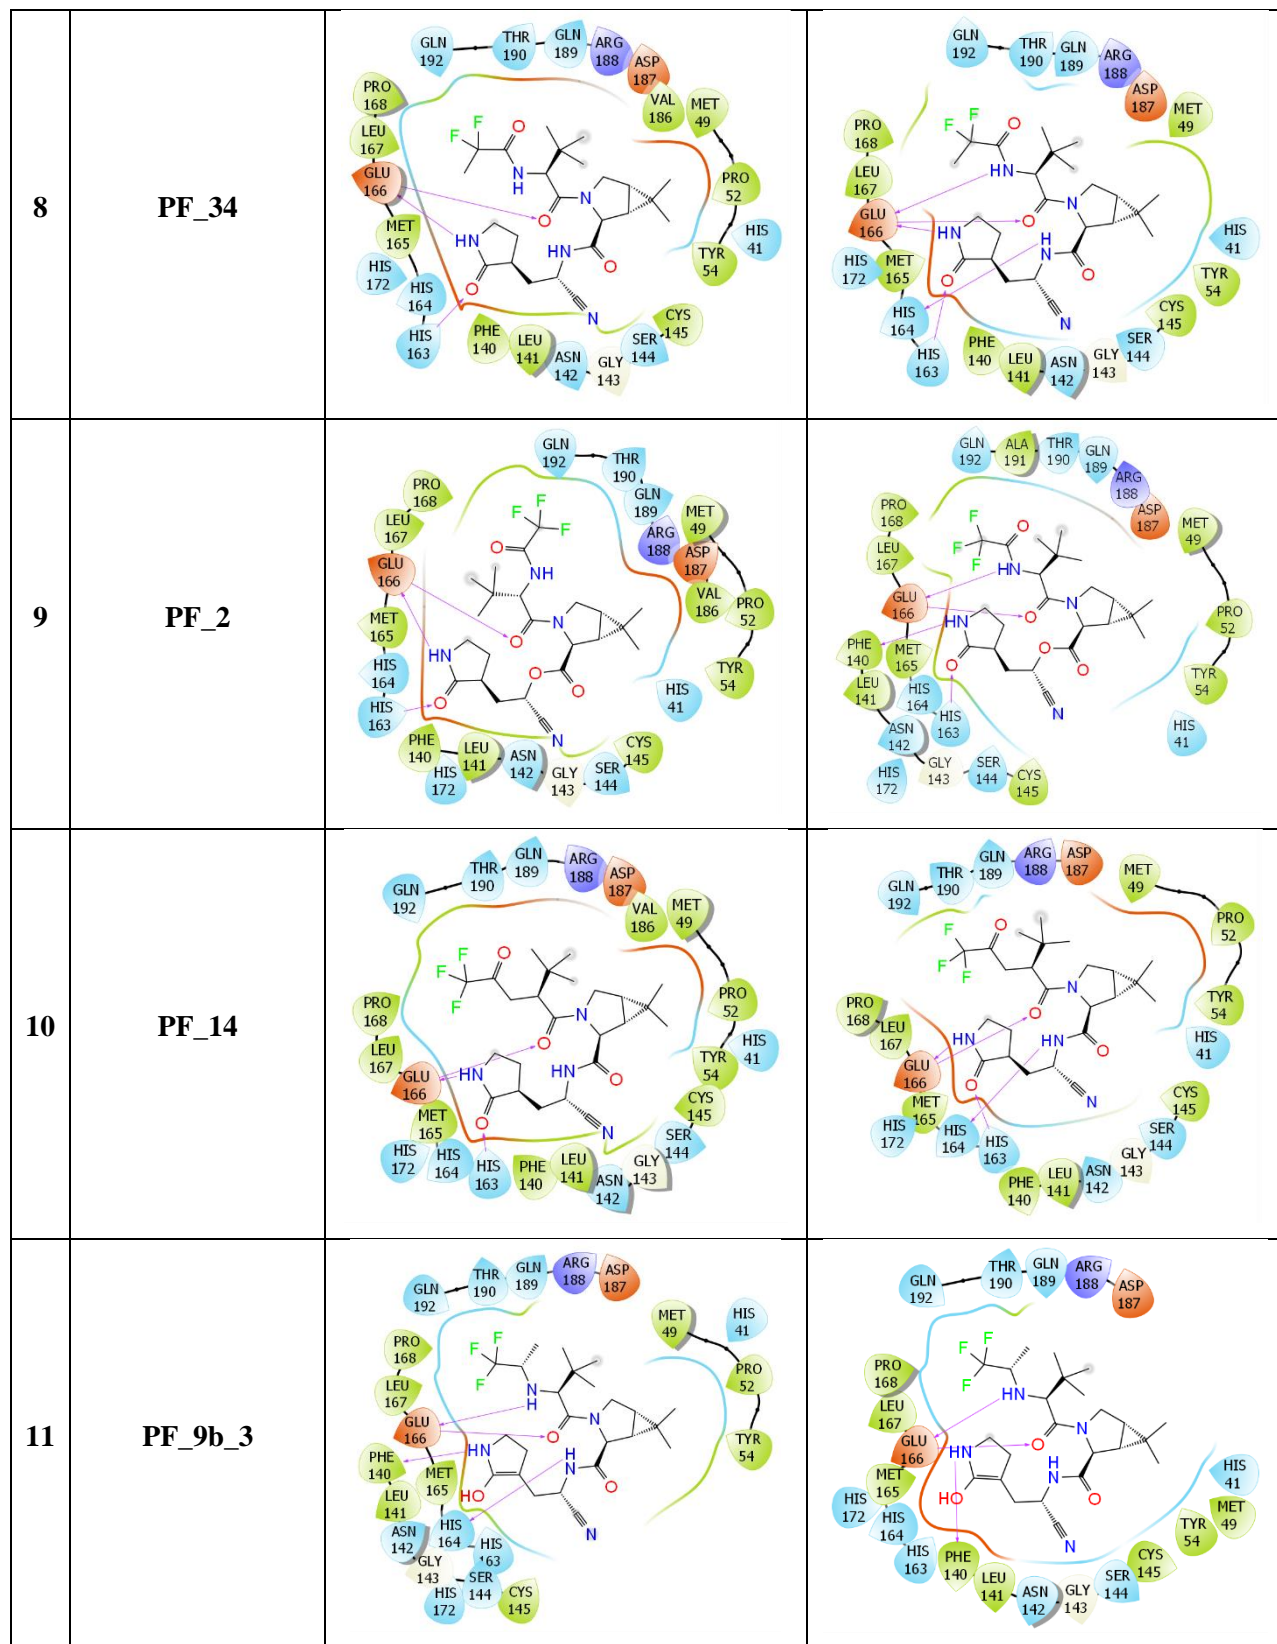



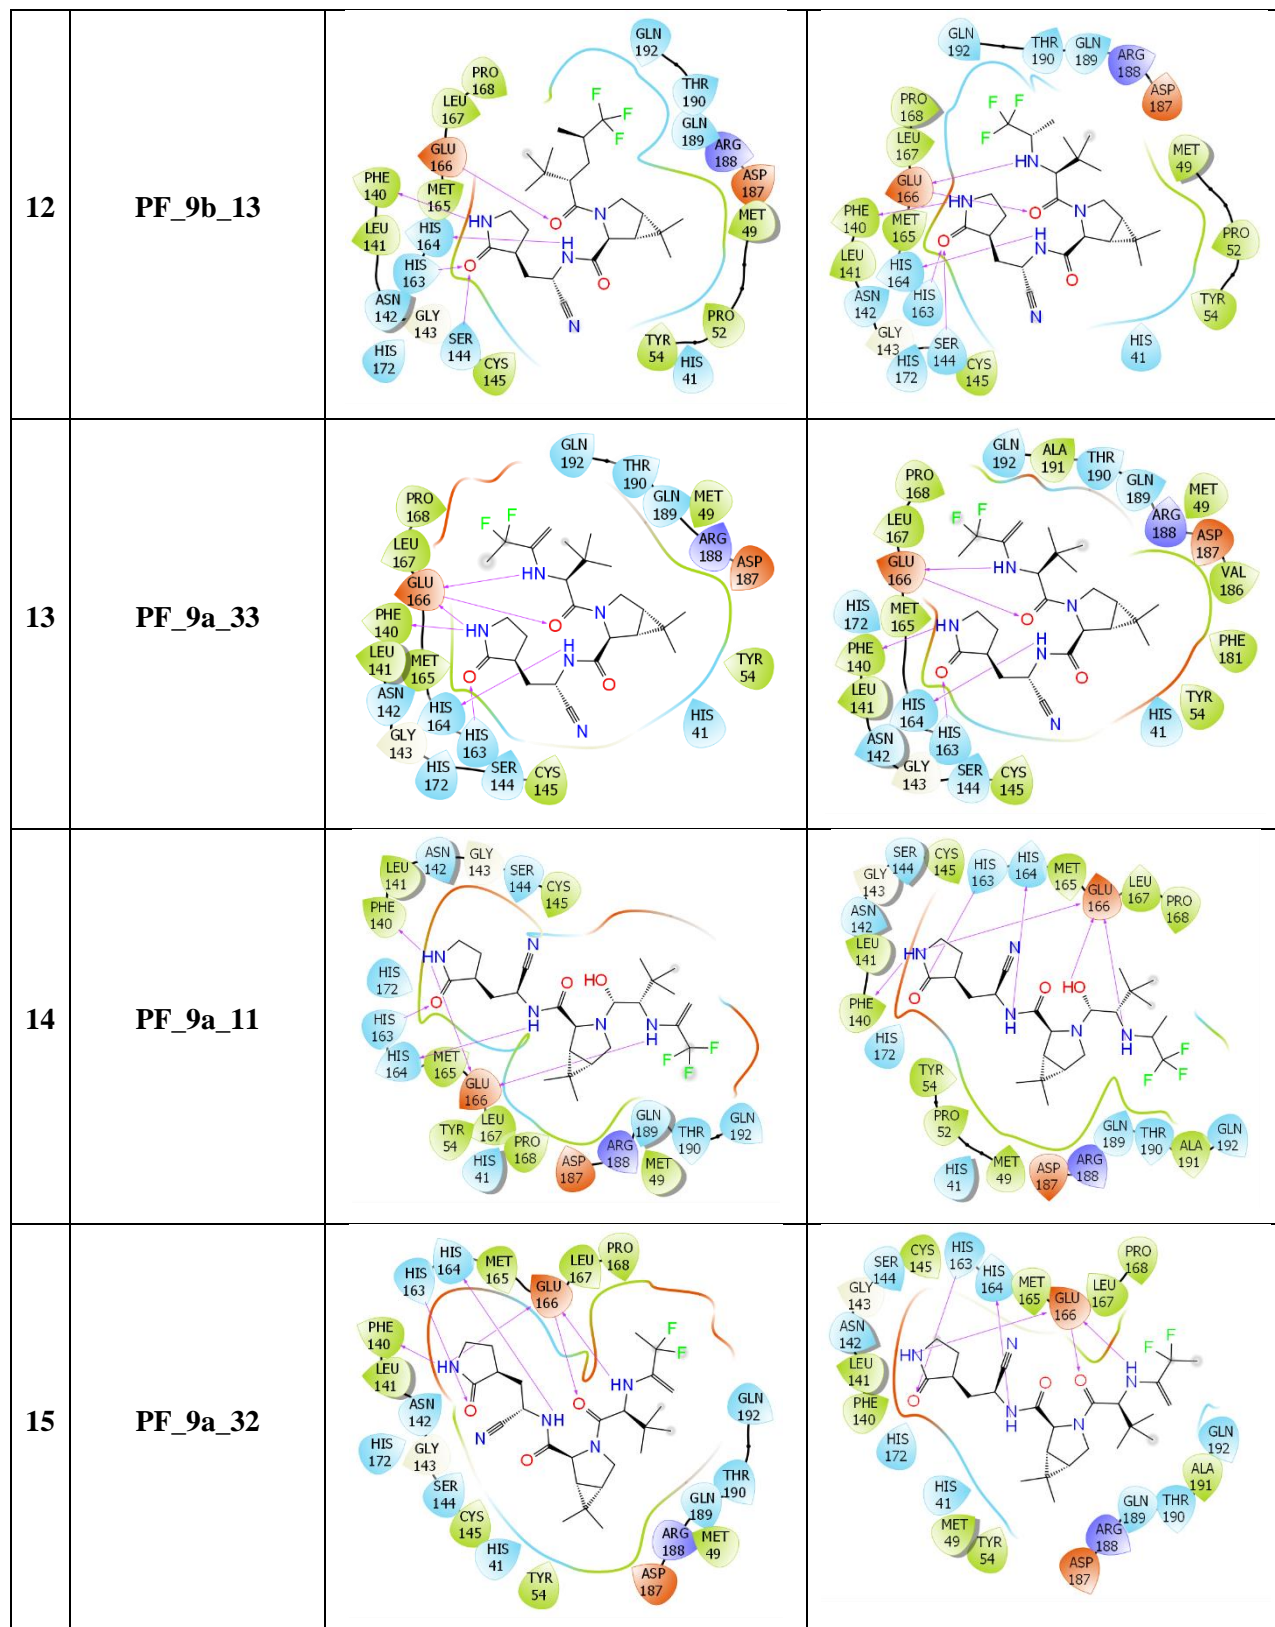



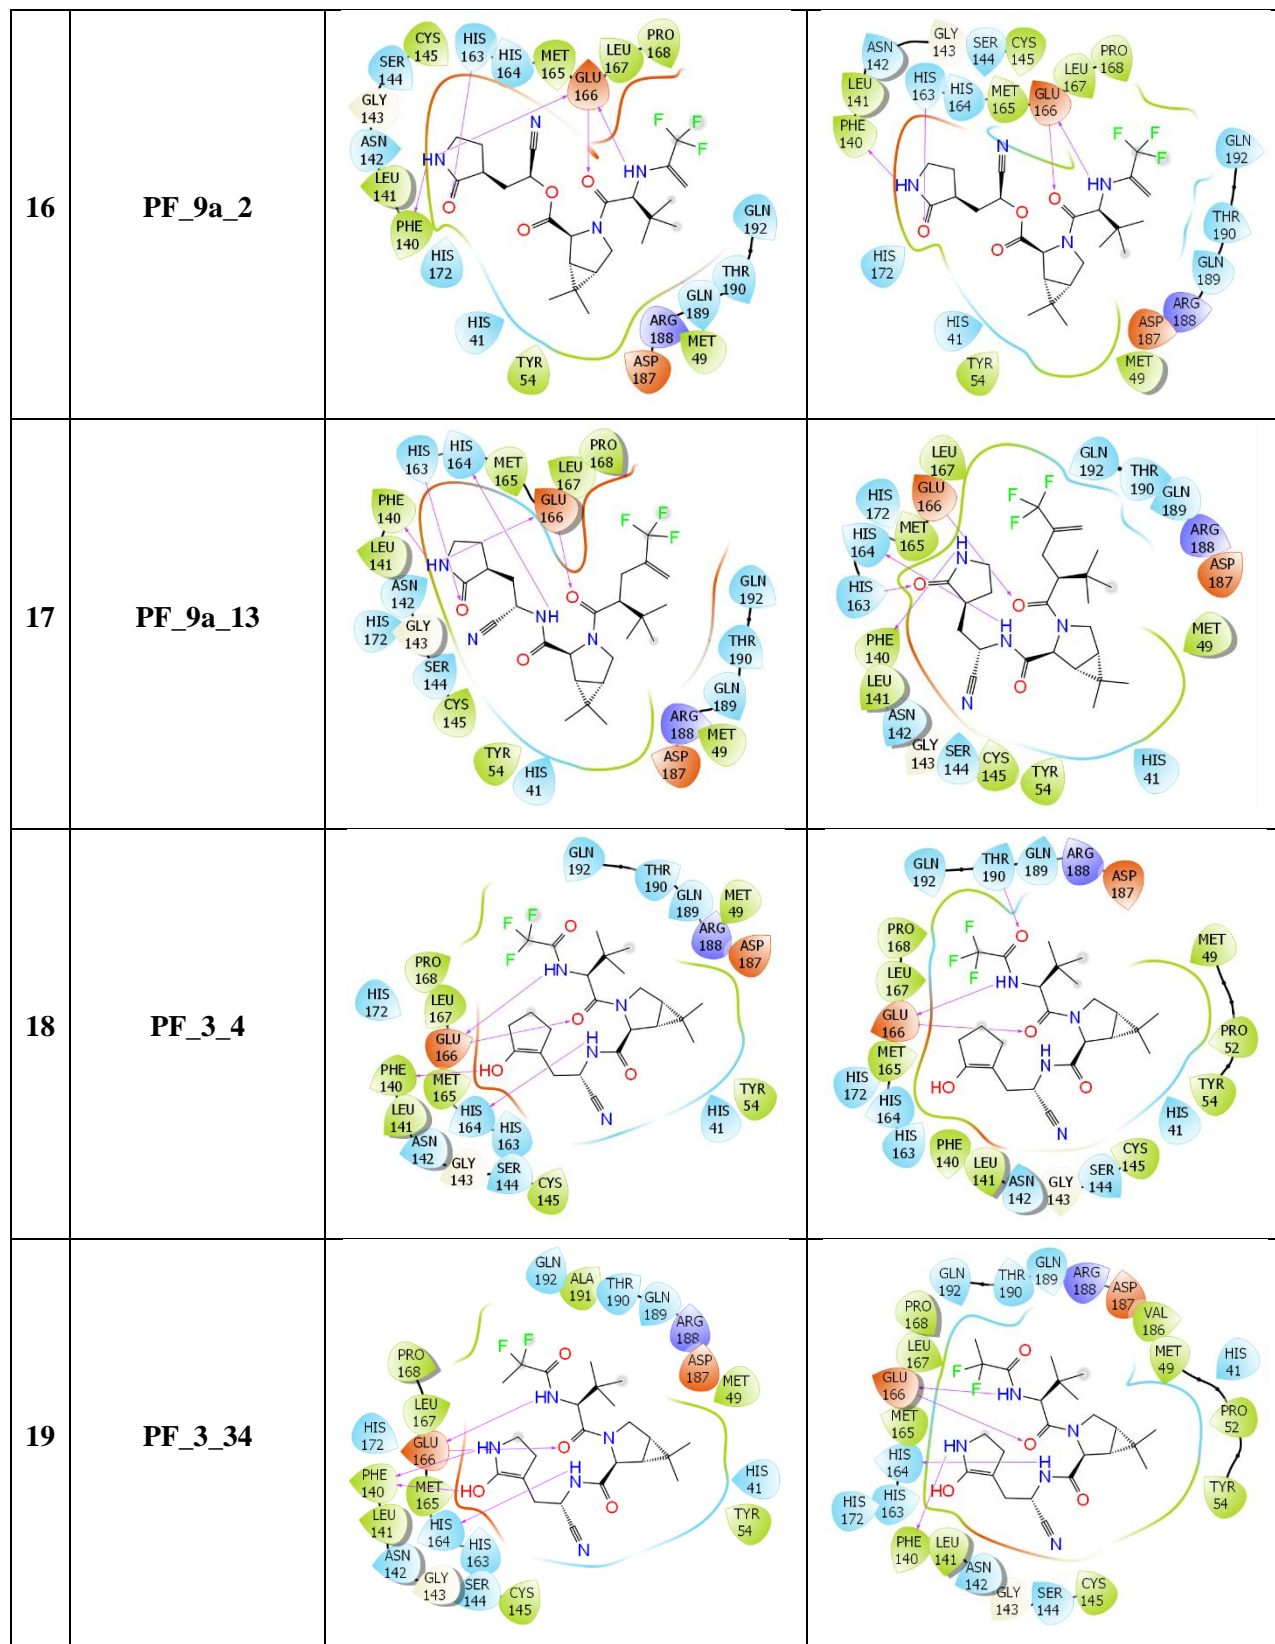

|    |          |  |  |
|----|----------|--|--|
| 20 | PF_3_2   |  |  |
| 21 | PF_3_13  |  |  |
| 22 | PF_35_14 |  |  |
| 23 | PF_12_33 |  |  |

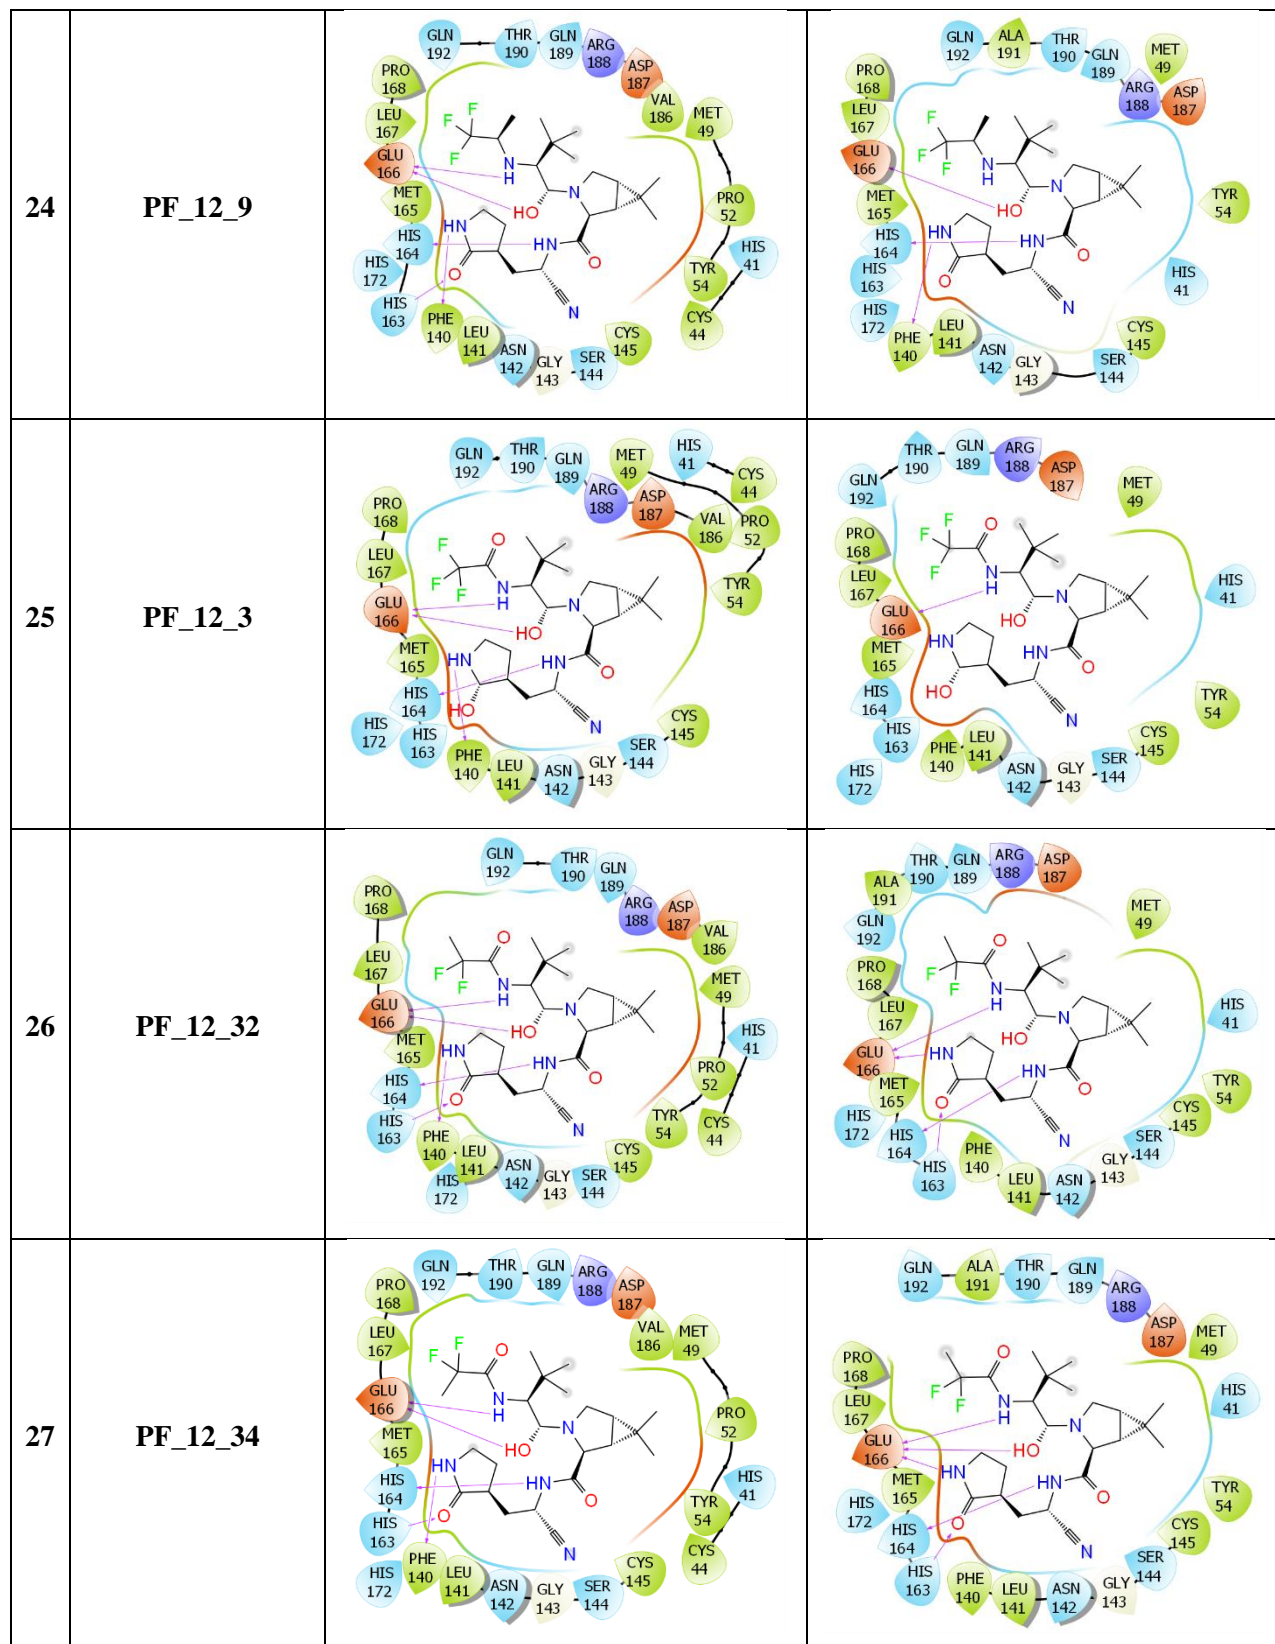



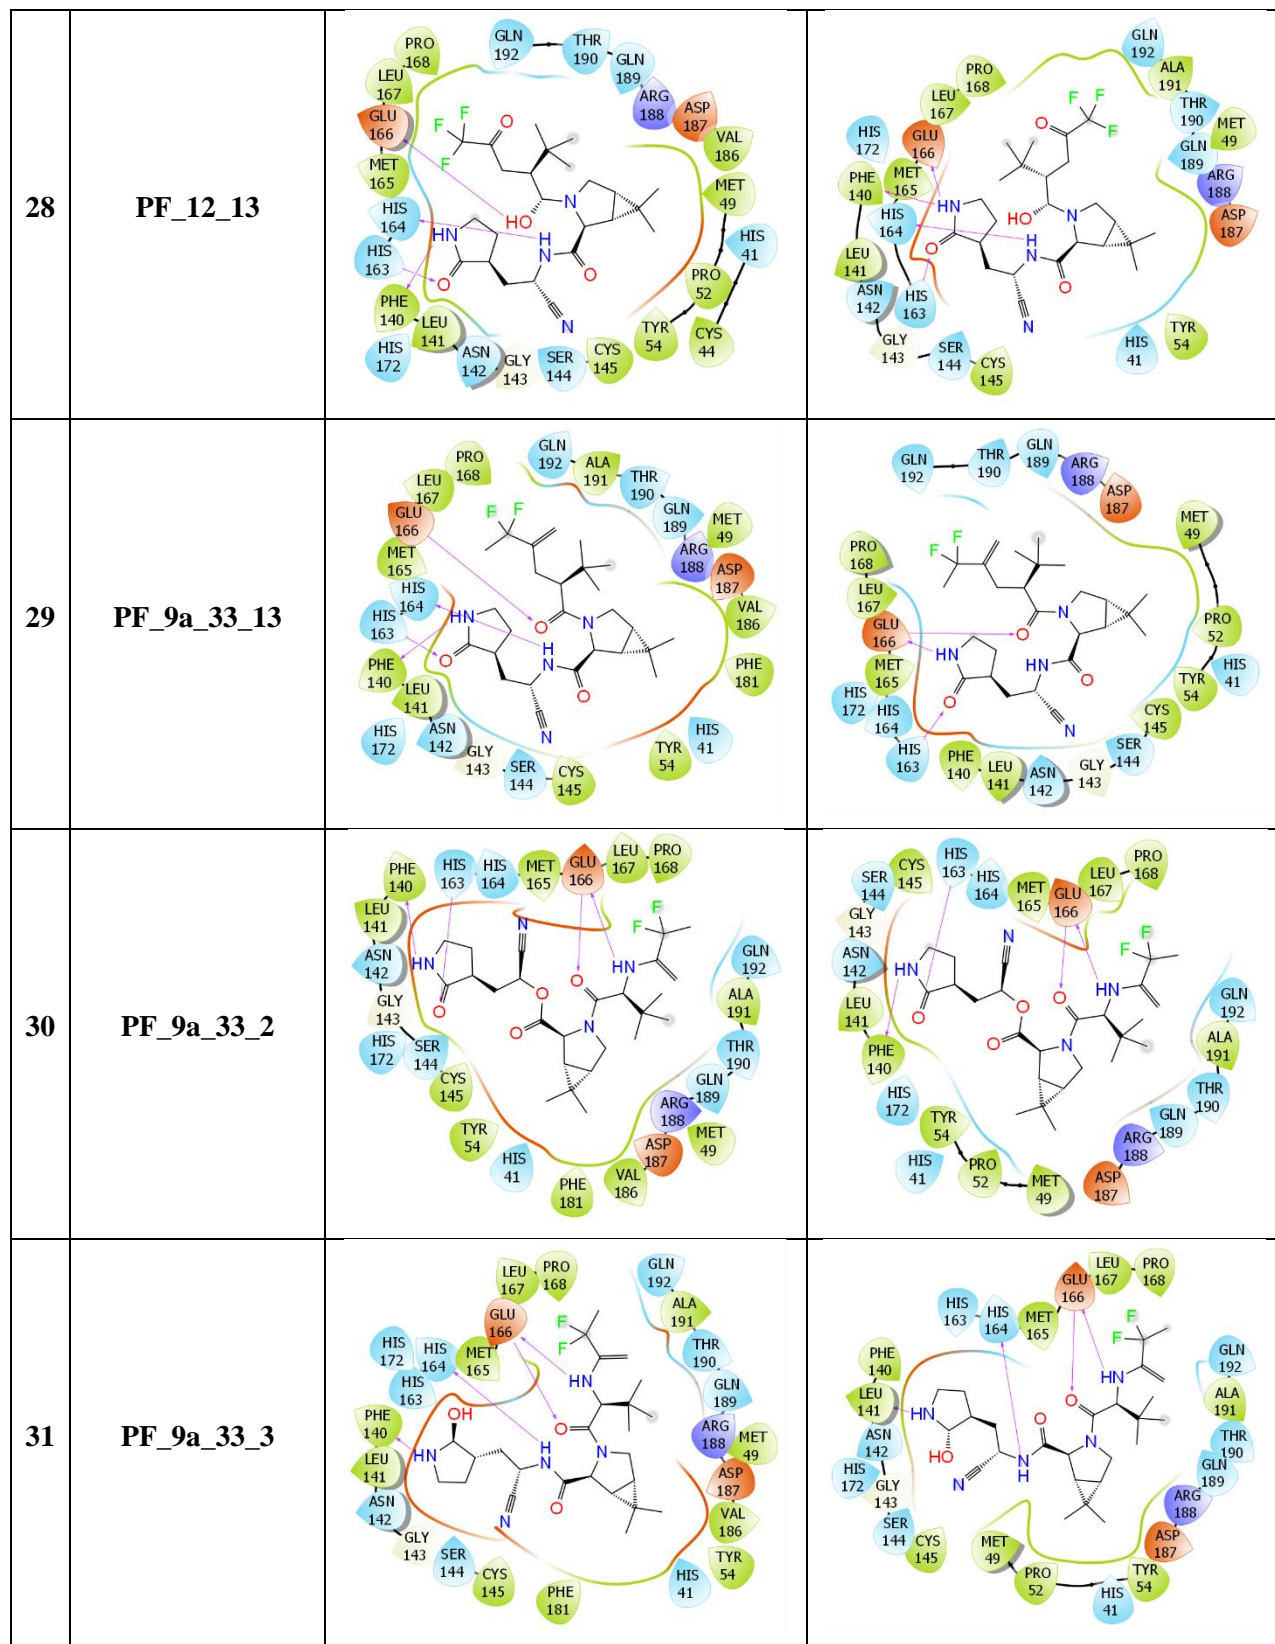

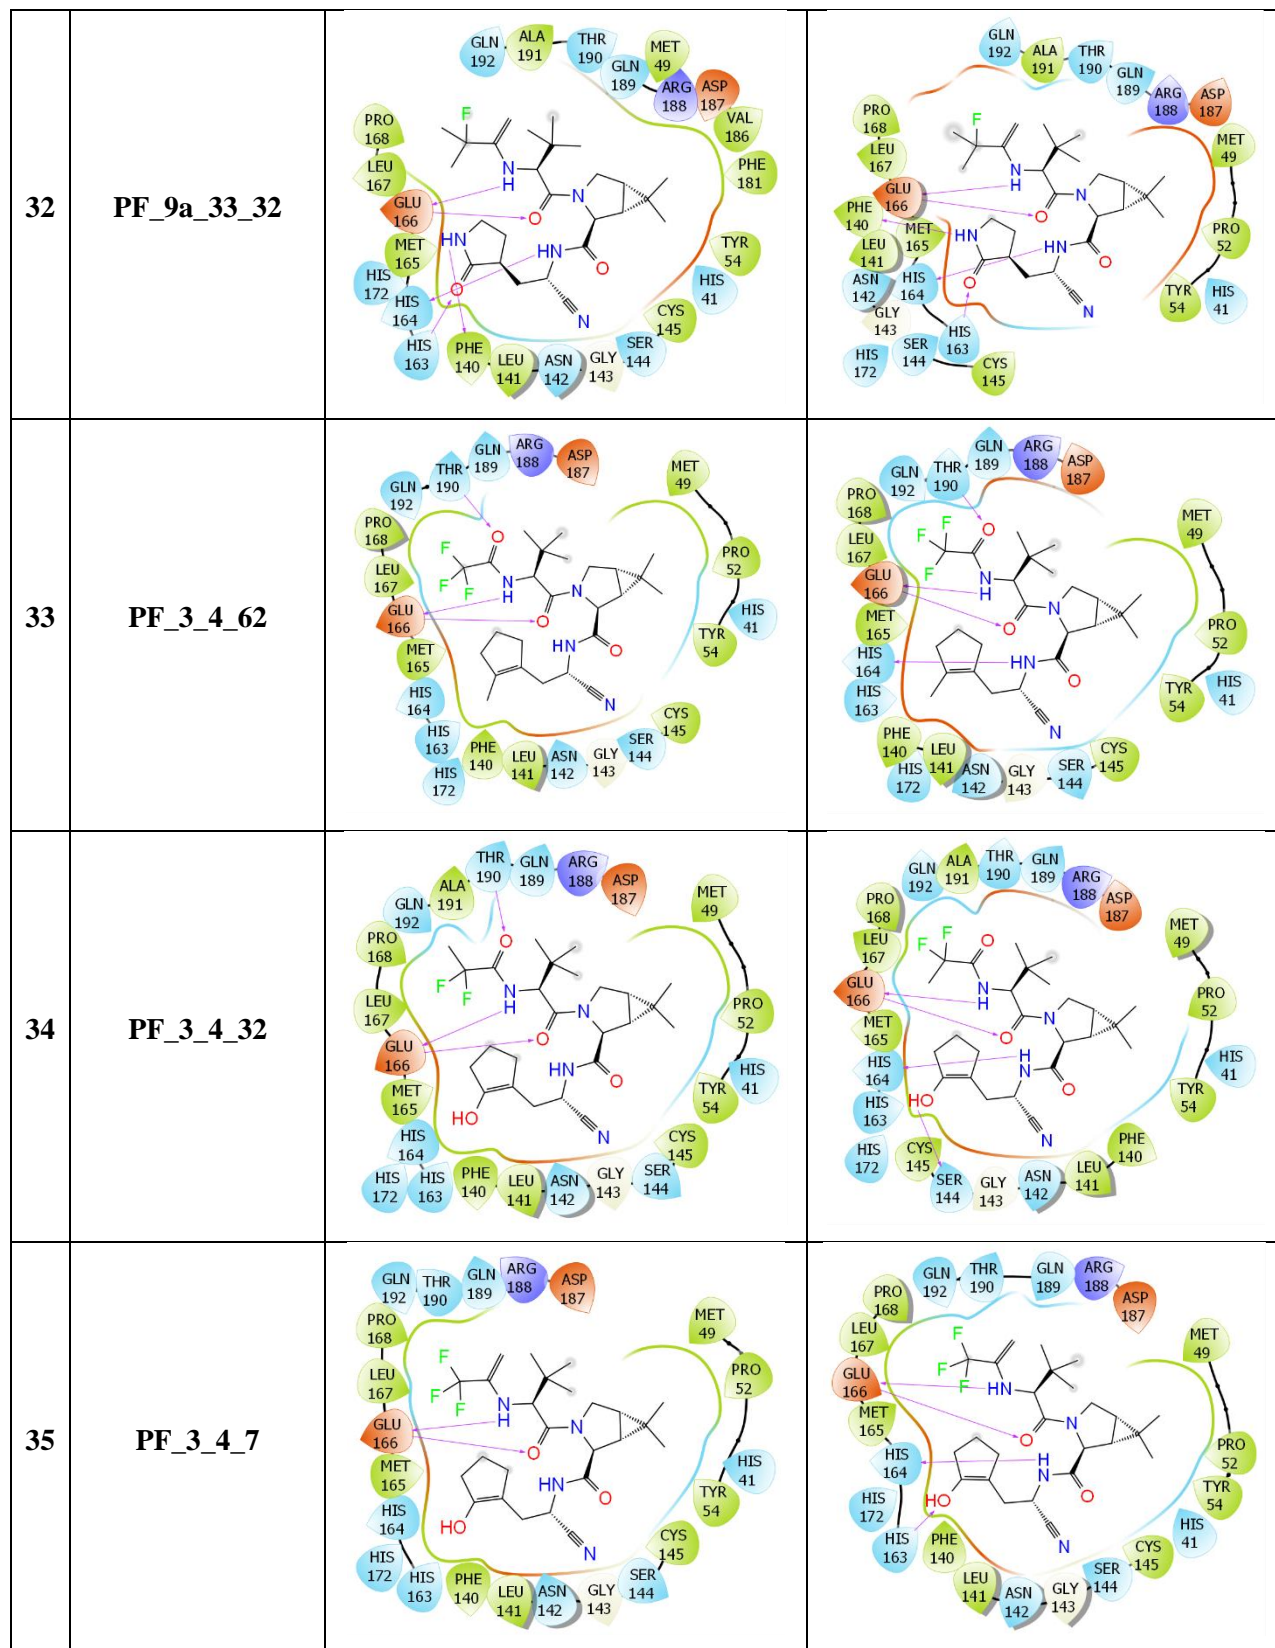



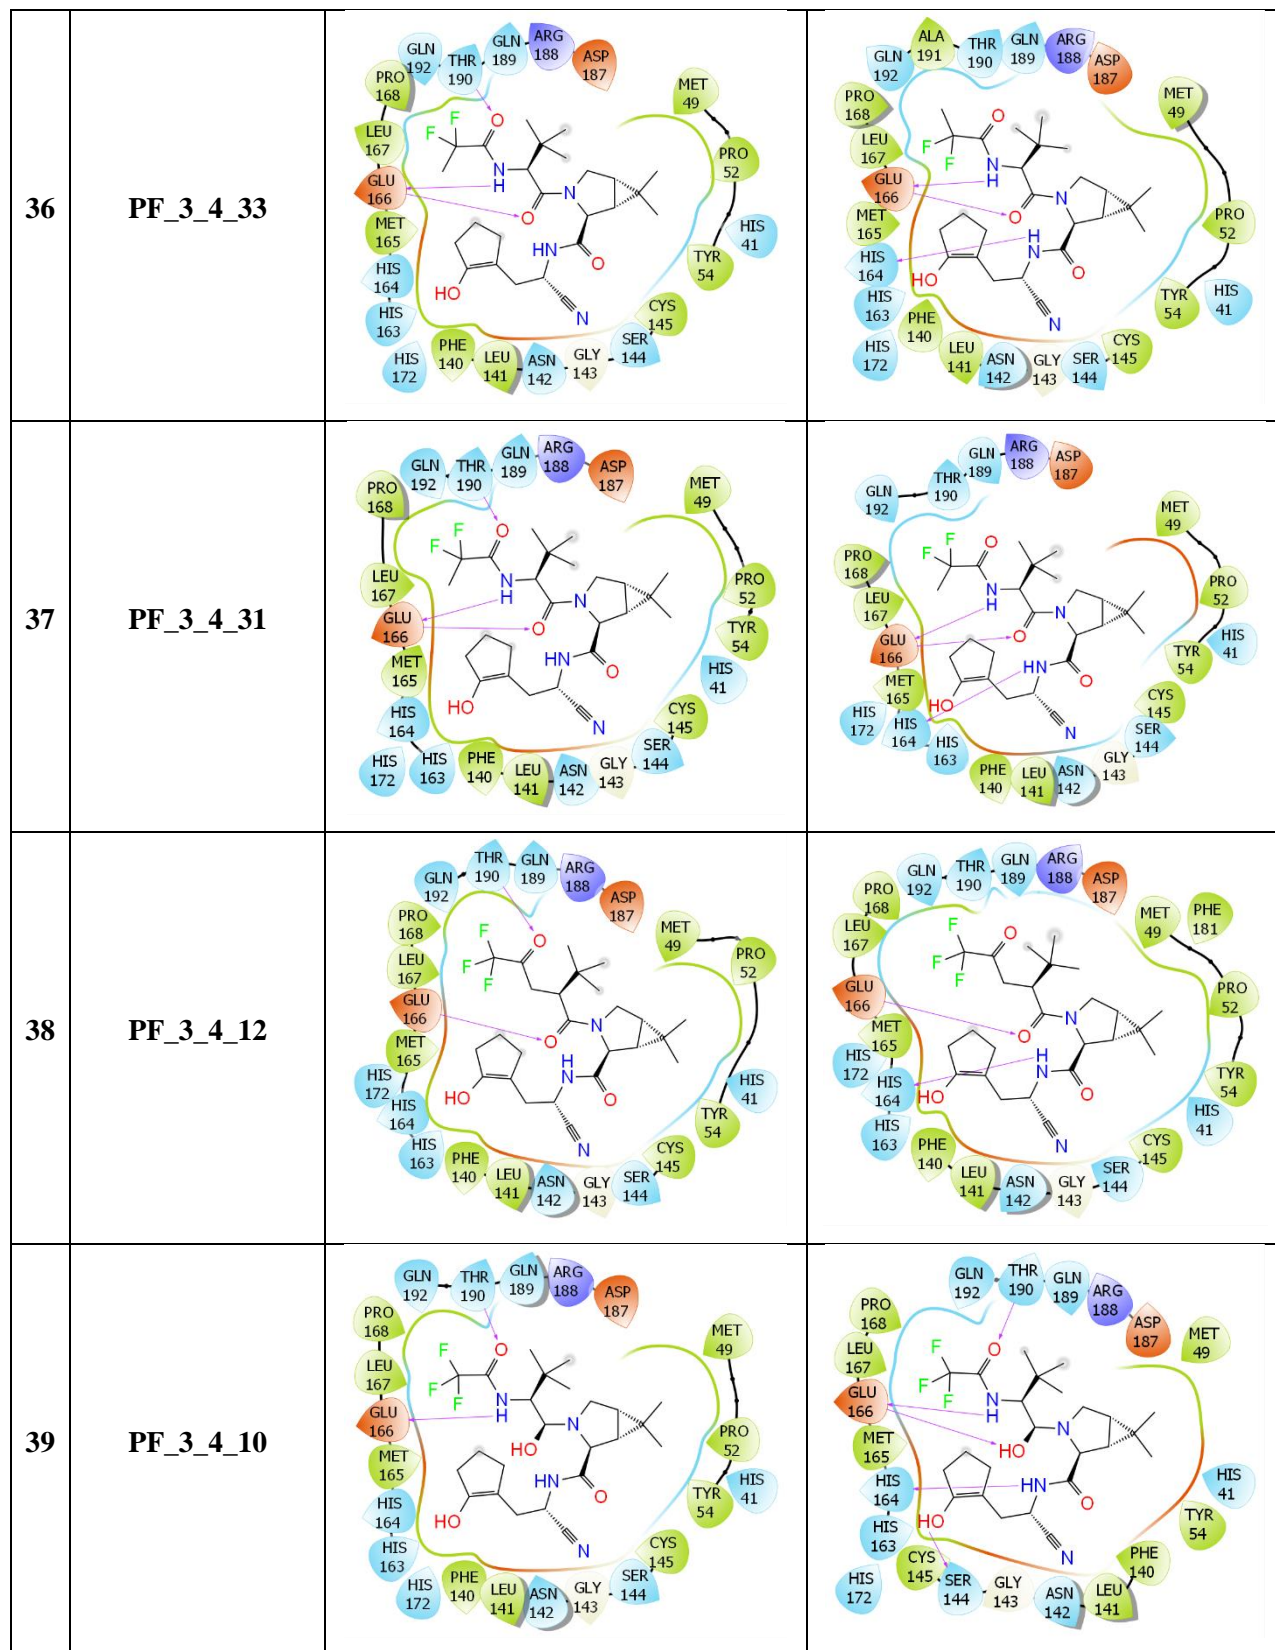

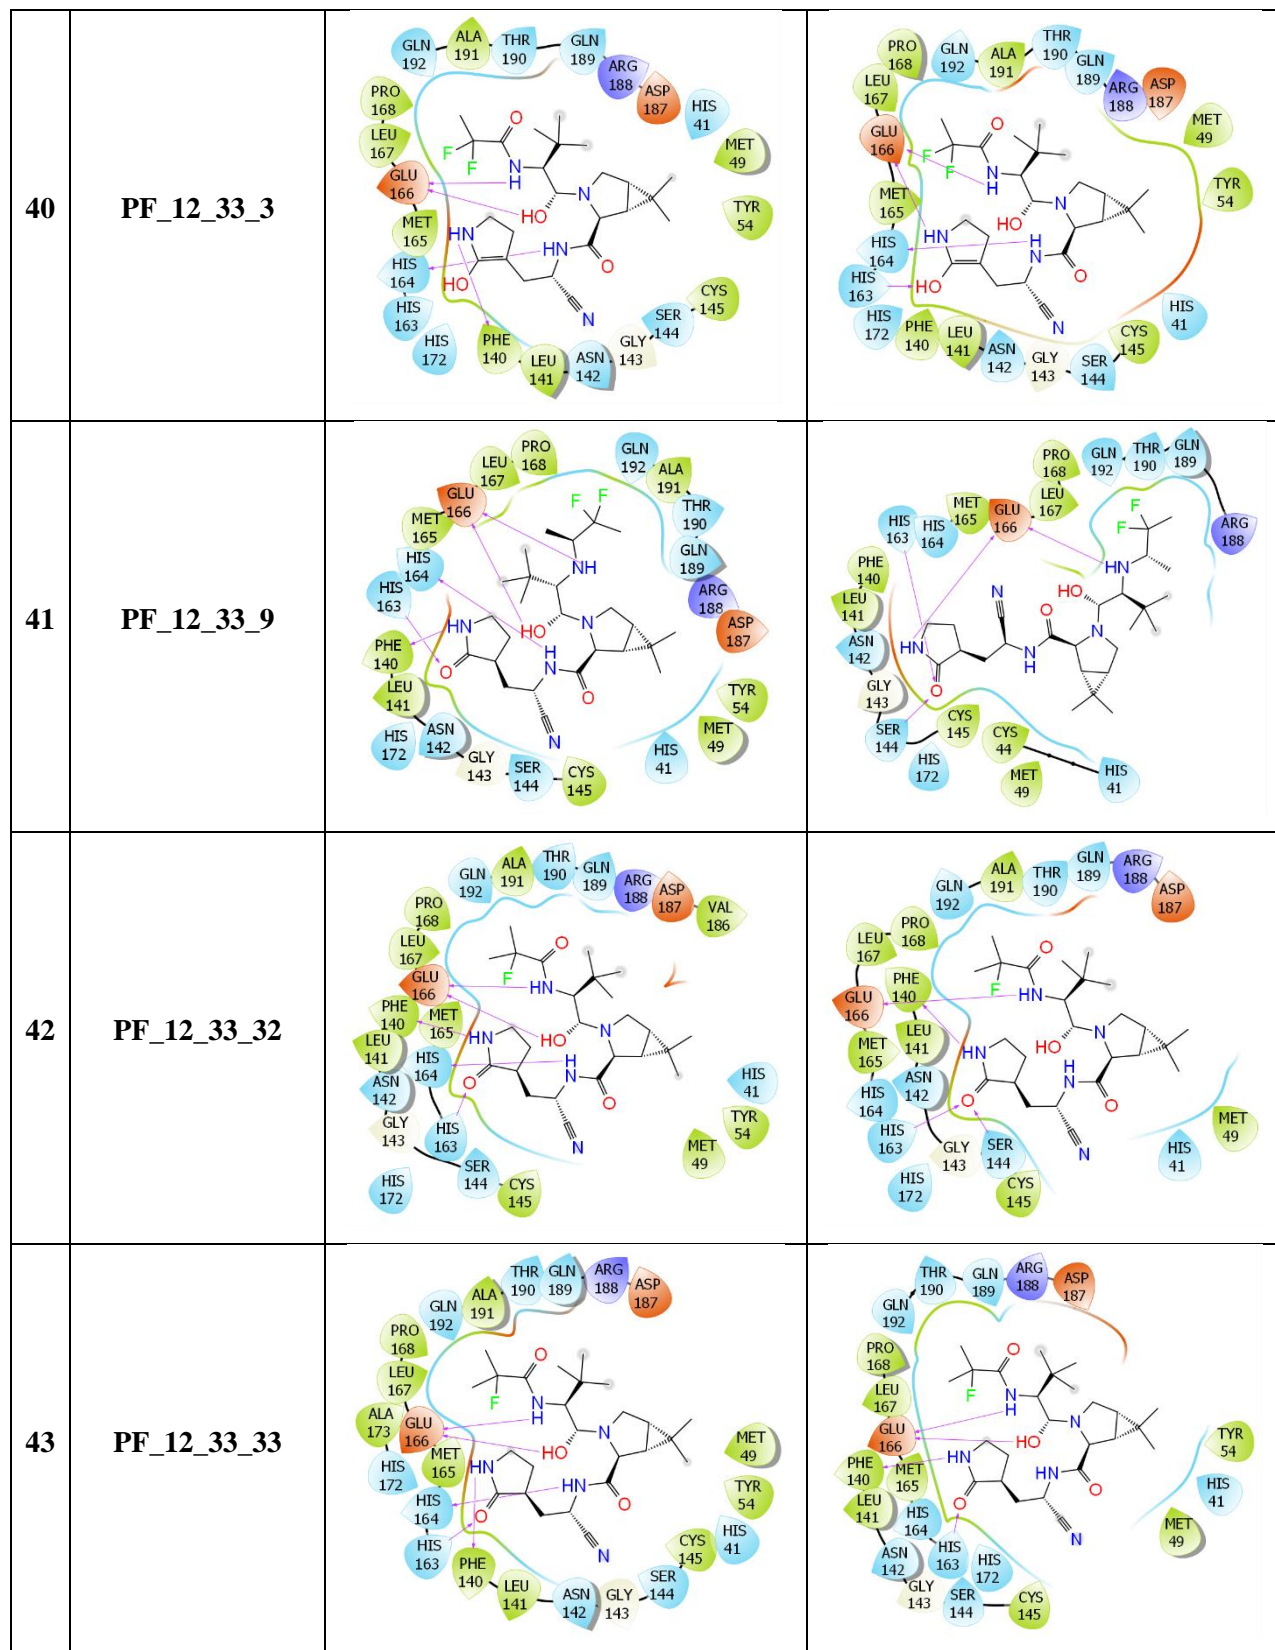

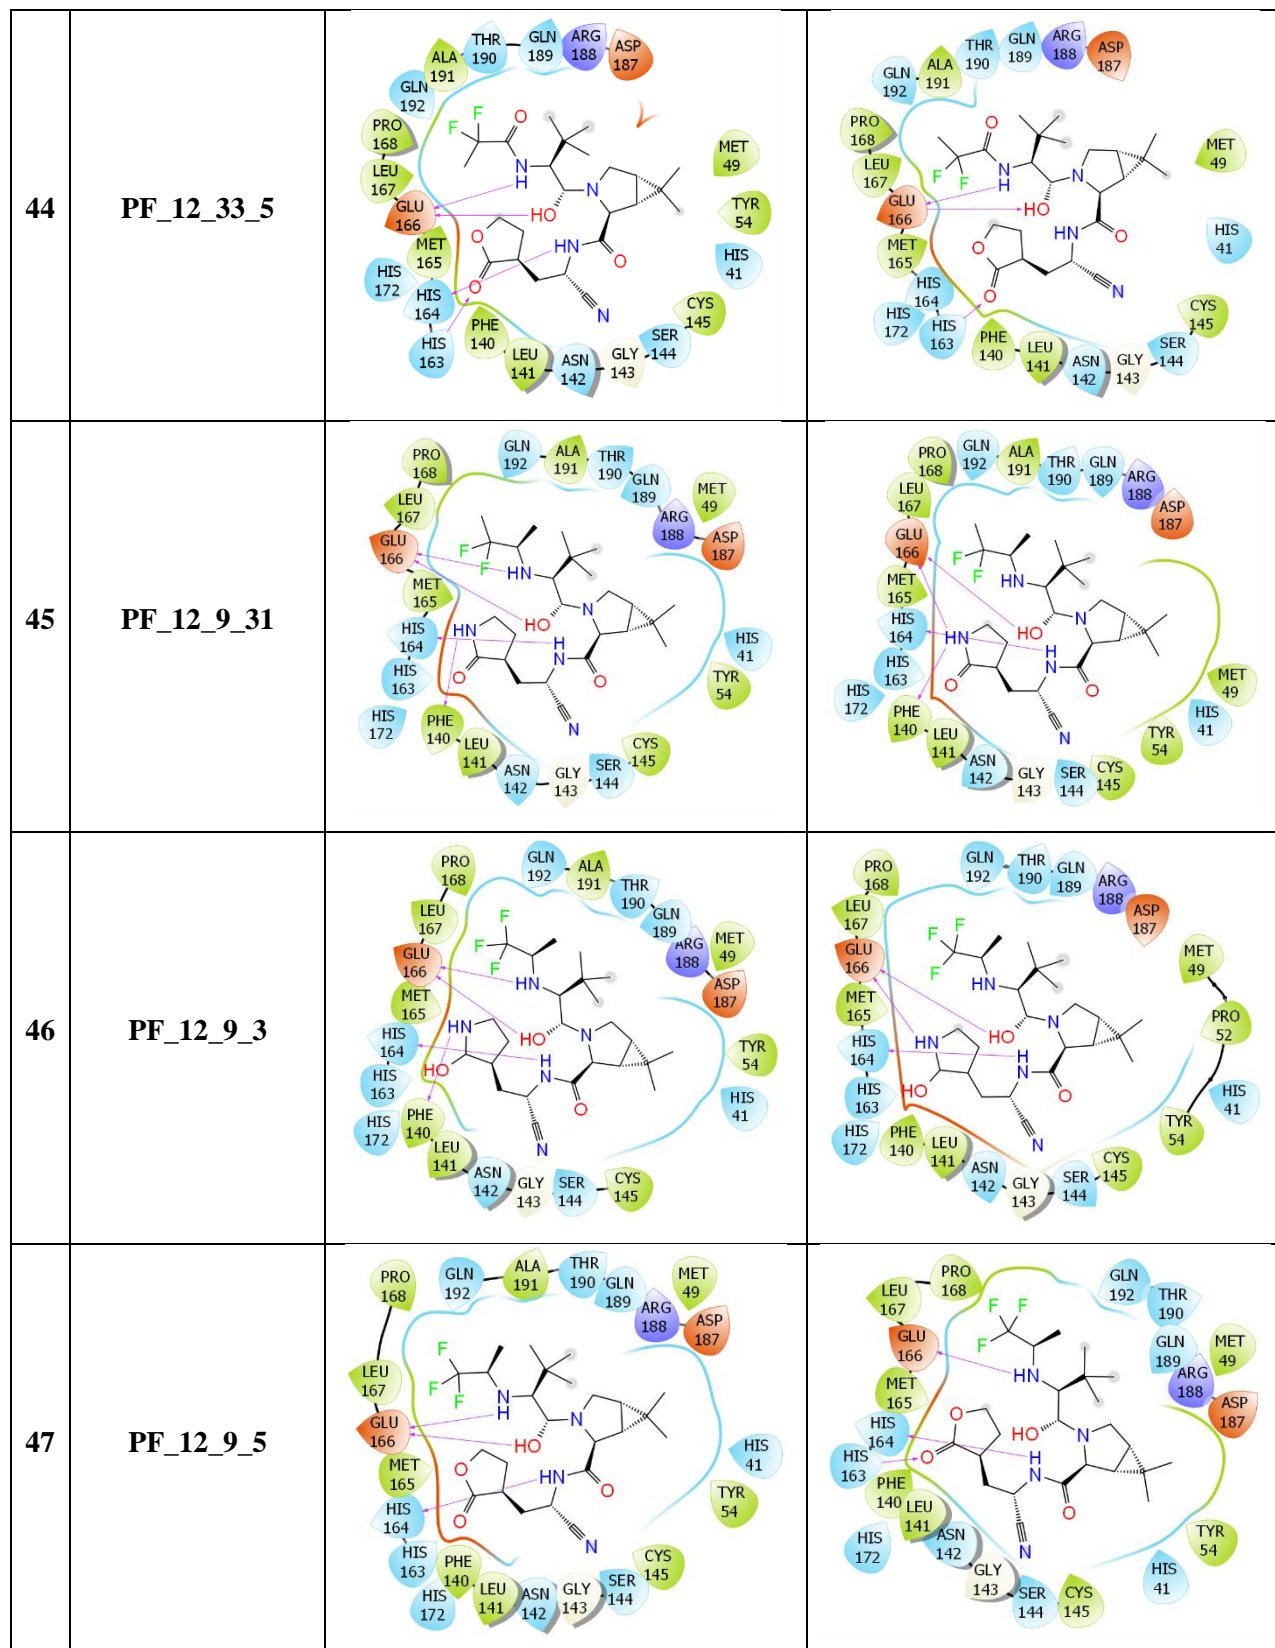



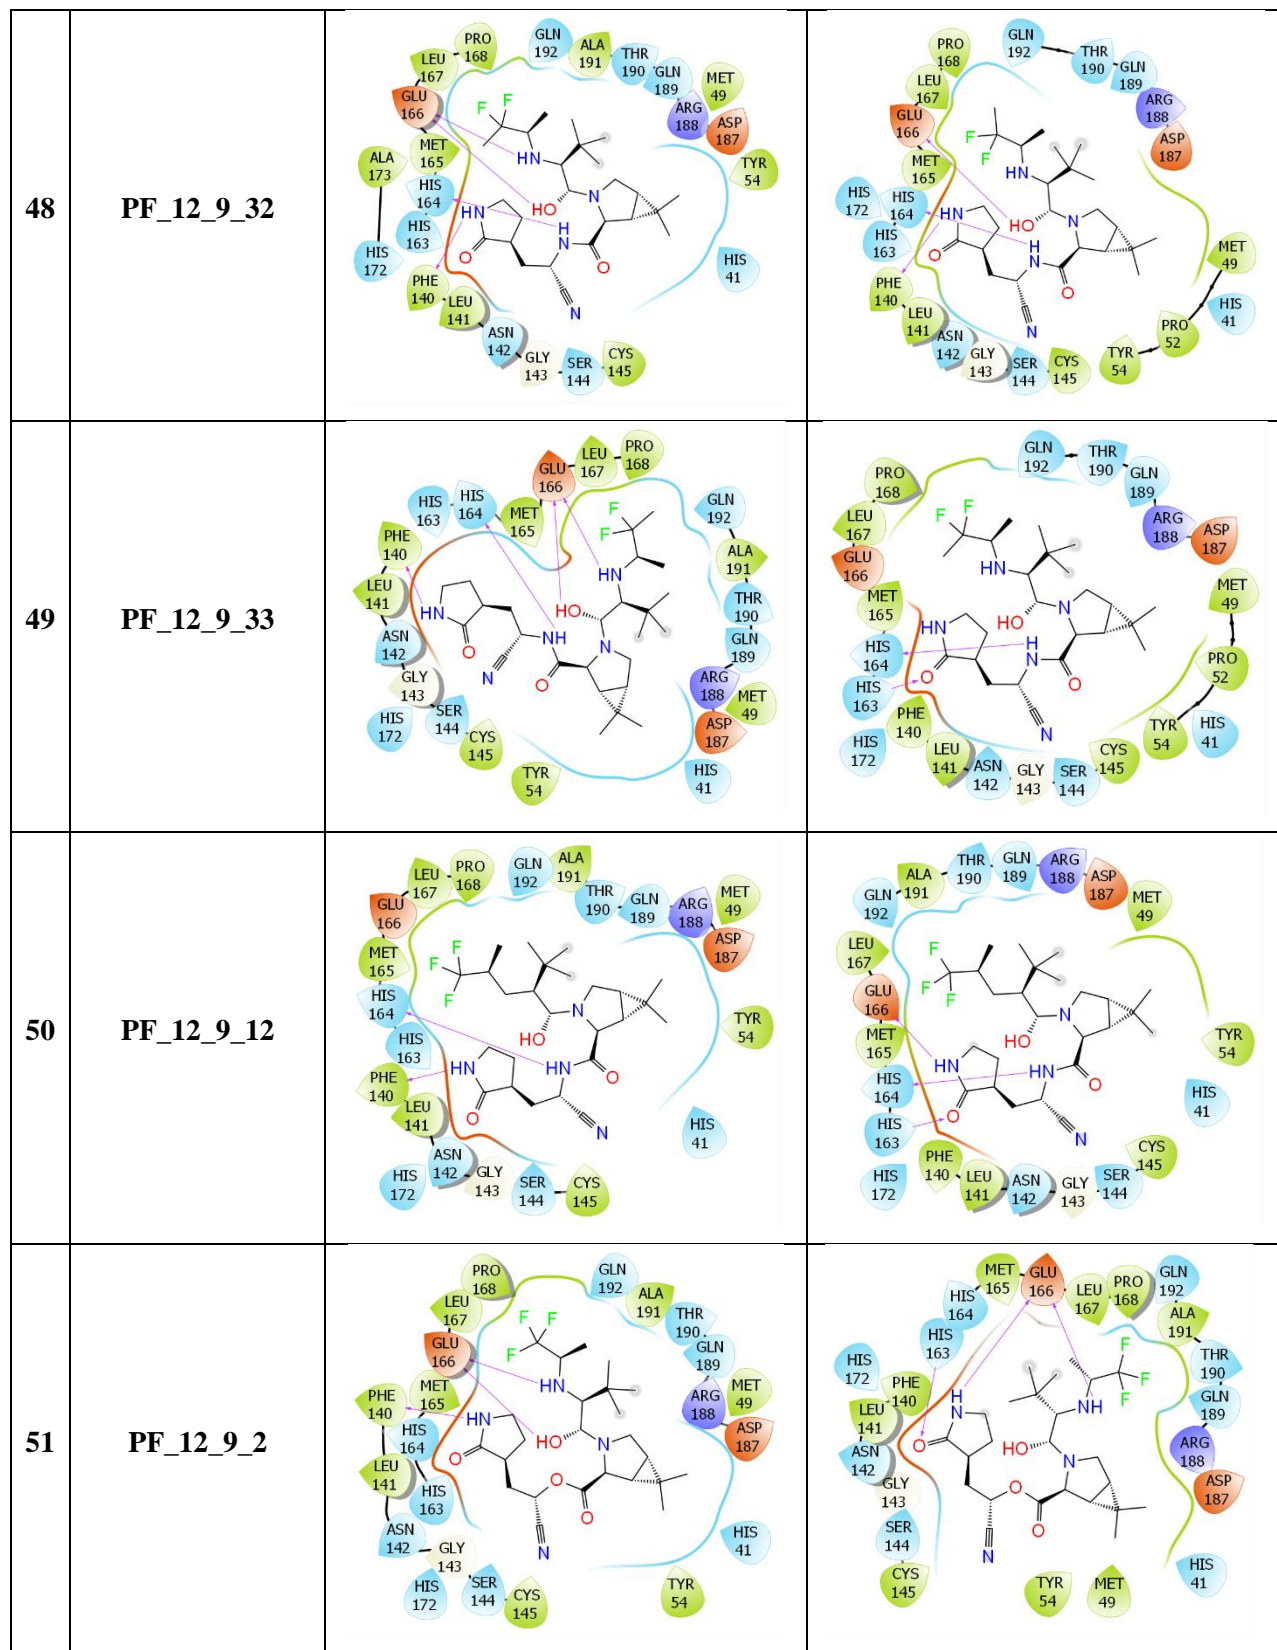

|    |              |  |  |
|----|--------------|--|--|
| 52 | PF_3_4_62_33 |  |  |
| 53 | PF_3_4_62_12 |  |  |
| 54 | PF_3_4_62_32 |  |  |
| 55 | PF_3_4_62_10 |  |  |



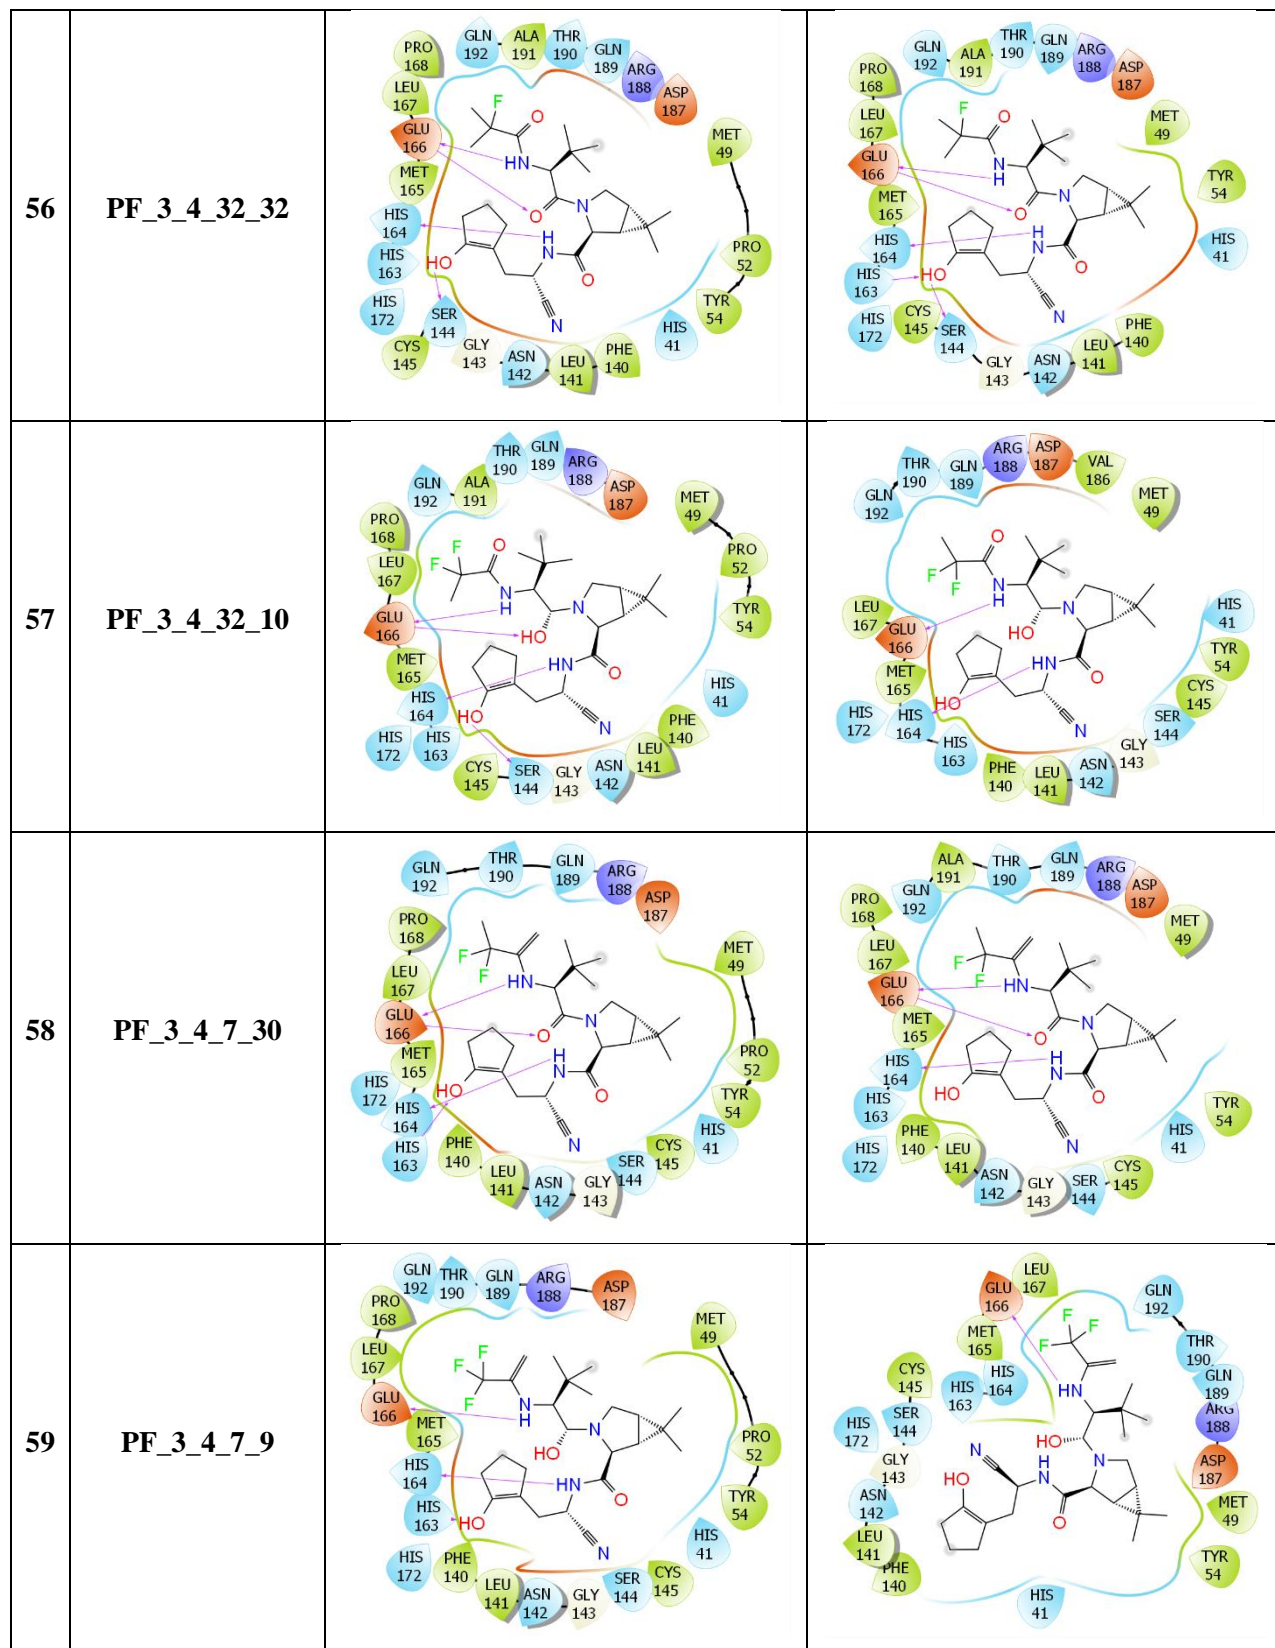

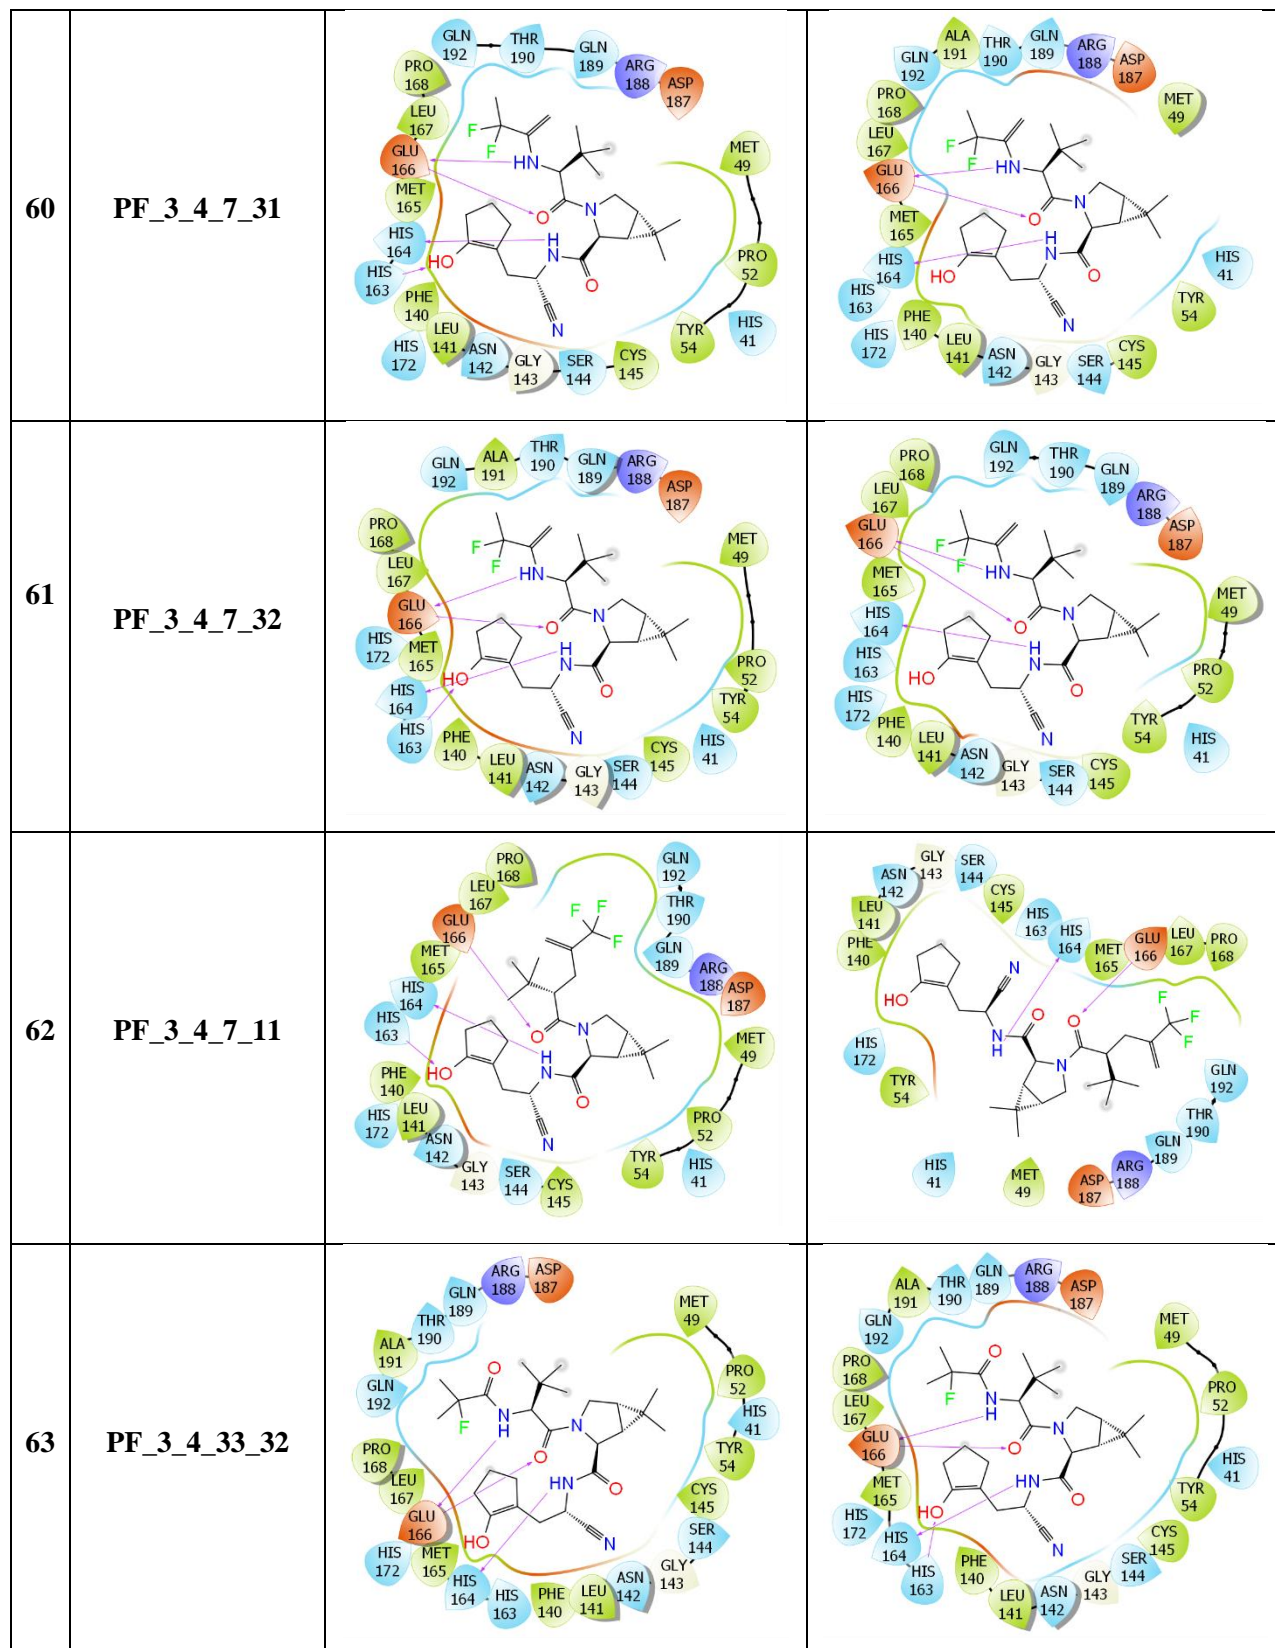



|    |              |  |  |
|----|--------------|--|--|
| 64 | PF_3_4_33_31 |  |  |
| 65 | PF_3_4_33_12 |  |  |
| 66 | PF_3_4_31_32 |  |  |
| 67 | PF_3_4_31_10 |  |  |

|    |               |  |  |
|----|---------------|--|--|
| 68 | PF_3_4_31_12  |  |  |
| 69 | PF_12_33_3_32 |  |  |
| 70 | PF_12_33_3_31 |  |  |
| 71 | PF_12_33_3_8  |  |  |



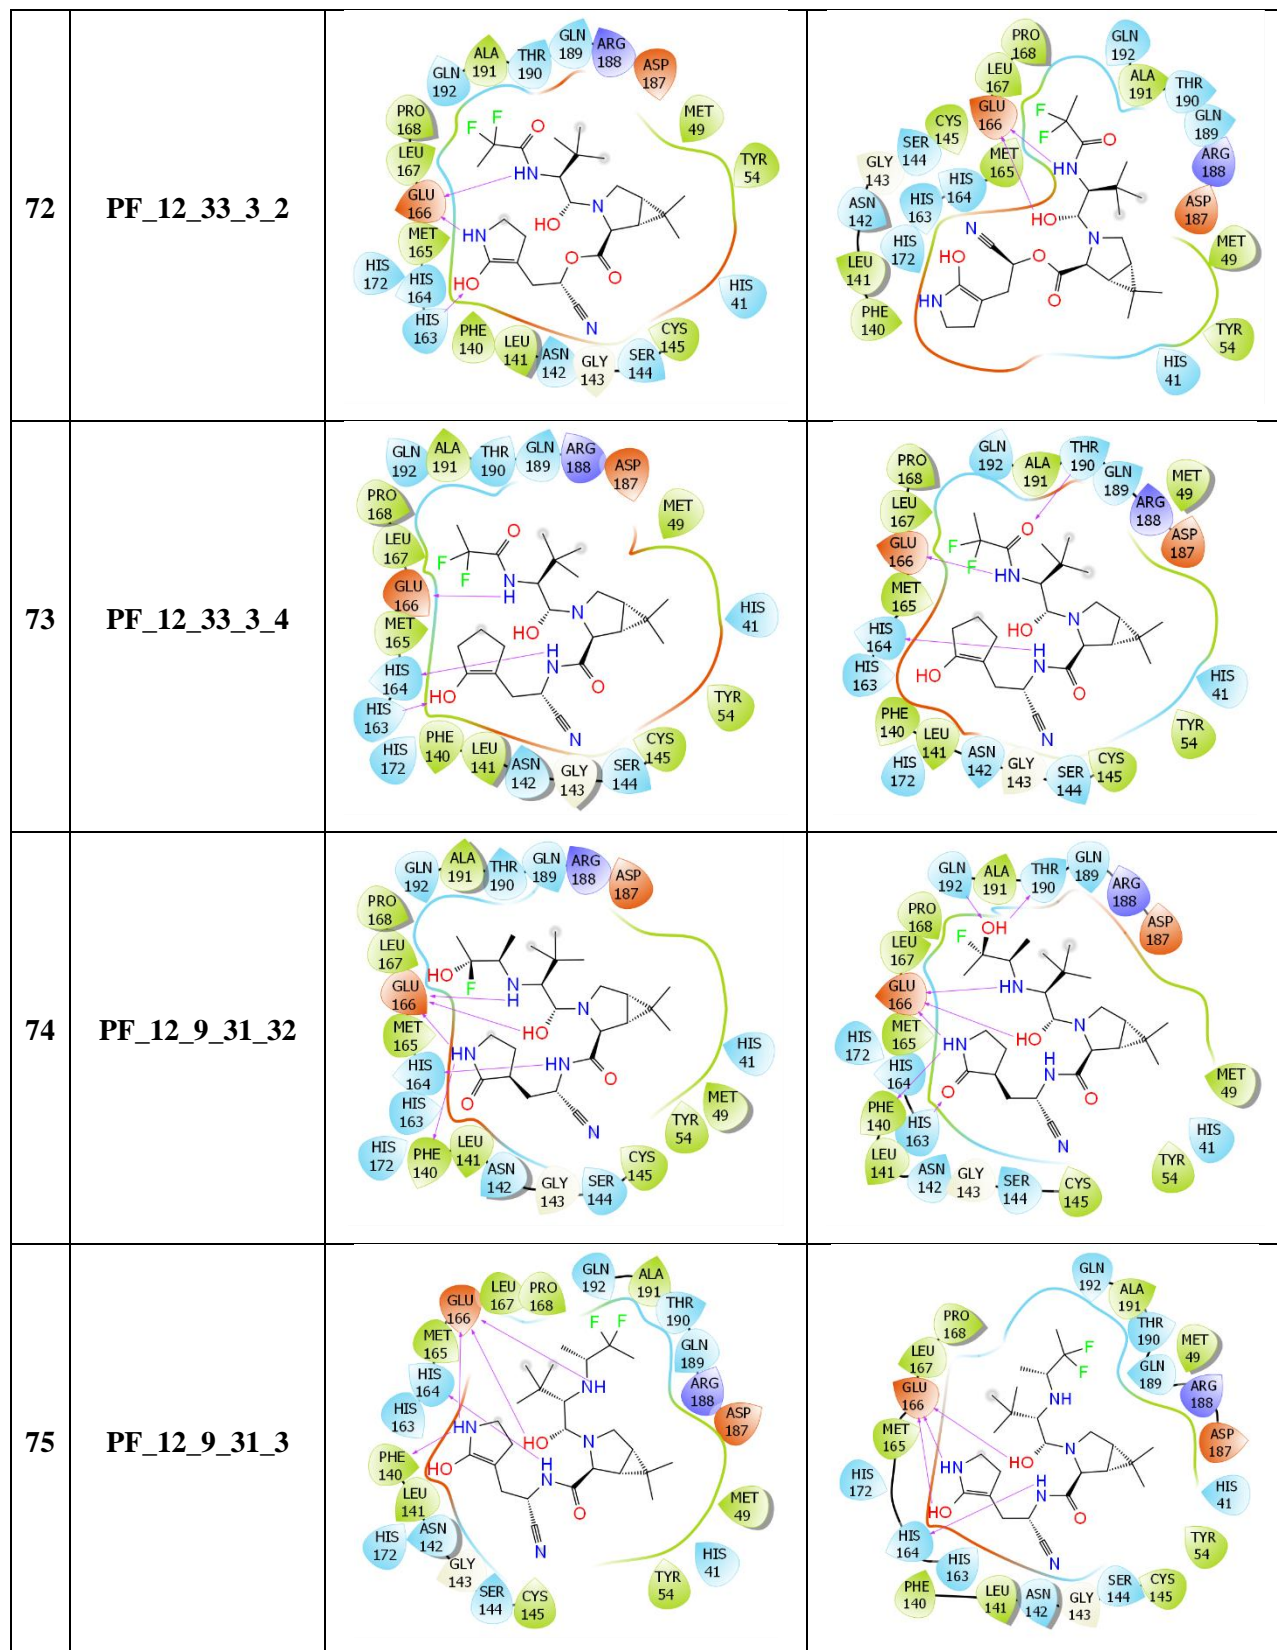

|    |              |  |  |
|----|--------------|--|--|
| 76 | PF_12_9_31_2 |  |  |
| 77 | PF_12_9_3_31 |  |  |
| 78 | PF_12_9_3_30 |  |  |
| 79 | PF_12_9_3_32 |  |  |





84 PF\_3\_4\_33\_31\_10

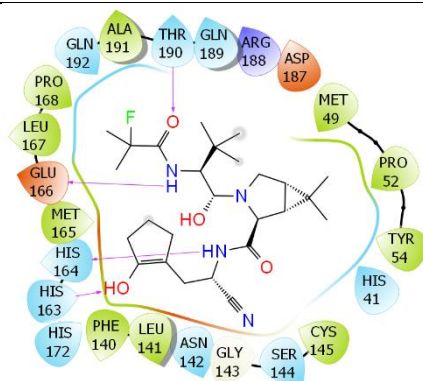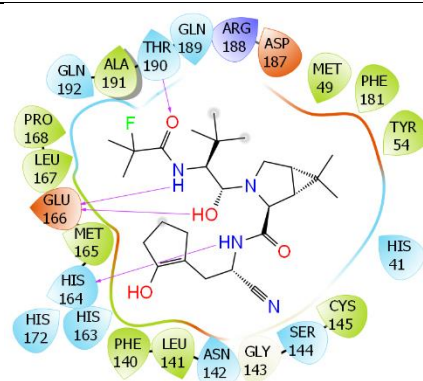

<sup>a</sup>The initial conformation of the complex, which was provided by DeepFrag application. <sup>b</sup>The MD-refined structure of the complex.

Table S8. Toxicity prediction via PreADMET.

| N <sup>o</sup> | Compound             | Carcino <sub>Mouse</sub> | Ames <sub>test</sub> | TA100 <sub>10RLI</sub> | TA100 <sub>NA</sub> | TA1535 <sub>10RLI</sub> | TA1535 <sub>NA</sub> |
|----------------|----------------------|--------------------------|----------------------|------------------------|---------------------|-------------------------|----------------------|
| 1              | <b>PF_3_4_62</b>     | negative                 | non-mutagen          | negative               | negative            | negative                | negative             |
| 2              | <b>PF_3_4_32</b>     | negative                 | non-mutagen          | negative               | negative            | negative                | negative             |
| 3              | <b>PF_3_4_33_32</b>  | negative                 | non-mutagen          | negative               | negative            | negative                | negative             |
| 4              | <b>PF_3_4_33_31</b>  | negative                 | non-mutagen          | negative               | negative            | negative                | negative             |
| 5              | <b>PF_12_9_31</b>    | negative                 | non-mutagen          | negative               | negative            | negative                | negative             |
| 6              | <b>PF_3_4_7</b>      | negative                 | non-mutagen          | negative               | negative            | negative                | negative             |
| 7              | <b>PF_9a_33</b>      | negative                 | non-mutagen          | negative               | negative            | negative                | negative             |
| 8              | <b>PF_3_4_33</b>     | negative                 | non-mutagen          | negative               | negative            | negative                | negative             |
| 9              | <b>PF_12_9_31_32</b> | negative                 | non-mutagen          | negative               | negative            | negative                | negative             |
| 10             | <b>PF_3_4_32_32</b>  | negative                 | non-mutagen          | negative               | negative            | negative                | negative             |
| 11             | <b>PF_12_9_3</b>     | negative                 | non-mutagen          | negative               | negative            | negative                | negative             |
| 12             | <b>PF_12_33_3</b>    | negative                 | non-mutagen          | negative               | negative            | negative                | negative             |
| 13             | <b>PF_3_4_31</b>     | negative                 | non-mutagen          | negative               | negative            | negative                | negative             |
| 14             | <b>PF_3_4_31_32</b>  | negative                 | non-mutagen          | negative               | negative            | negative                | negative             |
| 15             | <b>PF-07321332</b>   | positive                 | non-mutagen          | positive               | positive            | positive                | positive             |
